# Supplementary material for: Fusion, fission, and scrambling of the bilaterian genome in Bryozoa
Source: HighWire-hosted journal article supplement (doi:10.1101/gr.279636.124), 2025-01-01
Supplement: Supplemental_Data_S1-S2.xlsx [file Supplemental_Data_S1-S2.xlsx]

## Sheet: S1 Data
Orthogroup	Bilaterian linkage group (ALG)	Branchiostoma floridae	Bugulina stolonifera	Cristatella mucedo	Cryptosula pallasiana	Lingula anatina	Membranipora membranacea	Watersipora subatra	Lineus longissimus	Pecten maximus
OG0004710	H	BL24099	g3299.t1	g20770.t1	g29337.t1	g9573.t1	g1166.t1	g824.t1	g1548.t1	XP_033756664.1
OG0004711	F	BL02556	g18397.t1	g17124.t1	g9366.t1	g12189.t1	g13681.t1	g16010.t1	g15127.t1	XP_033742457.1
OG0004712	N	BL13883	g12973.t2	g25307.t1	g23633.t1	g7010.t3	g25764.t2	g20045.t1	g15555.t3	XP_033760985.1
OG0004713	C2	BL16740	g16271.t1	g19511.t1	g6068.t1	g9276.t1	g18655.t1	g11821.t1	g20779.t1	XP_033725813.1
OG0004714	Eb	BL28013	g3991.t1	g4881.t1	g10239.t1	g18140.t1	g10464.t1	g6059.t1	g11446.t1	XP_033746688.1
OG0004715	G	BL20051	g1509.t1	g7274.t1	g24027.t1	g1008.t1	g1466.t1	g2021.t1	g2630.t1	XP_033747710.1
OG0004716	R	BL24108	g11050.t2	g1802.t1	g2824.t1	g169.t1	g16005.t1	g13942.t1	g13738.t1	XP_033752642.1
OG0004717	H	BL24727	g10359.t1	g21199.t2	g21294.t1	g10903.t2	g8294.t1	g4306.t1	g1570.t2	XP_033753204.1
OG0004718	B3	BL02071	g17534.t1	g11867.t1	g18606.t1	g10246.t1	g22290.t1	g20972.t1	g21669.t1	XP_033728377.1
OG0004719	L	BL05995	g150.t2	g2136.t1	g25751.t1	g4855.t2	g834.t1	g3014.t1	g6882.t1	XP_033738634.1
OG0004720	D	BL03599	g8923.t1	g8077.t1	g19935.t2	g14547.t1	g6906.t1	g4474.t2	g16755.t1	XP_033755426.1
OG0004721	L	BL06259	g8252.t1	g9987.t1	g16584.t1	g5718.t2	g5689.t1	g8981.t1	g7422.t3	XP_033738010.1
OG0004722	A1a	BL22487	g11471.t1	g19231.t1	g4599.t1	g7823.t1	g14701.t1	g14092.t1	g5888.t2	XP_033734330.1
OG0004723	H	BL09075	g3877.t1	g21619.t1	g10204.t2	g9551.t2	g10658.t1	g5842.t1	g488.t2	XP_033744069.1
OG0004724	J2	BL03454	g2130.t1	g9971.t1	g23834.t2	g2035.t1	g1789.t1	g2049.t1	g7423.t1	XP_033738108.1
OG0004725	D	BL05515	g3969.t1	g13572.t1	g10181.t1	g15574.t1	g12176.t1	g5853.t1	g16583.t1	XP_033753764.1
OG0004726	M	BL26946	g16691.t1	g19308.t1	g5399.t1	g11541.t1	g19490.t1	g12053.t1	g23888.t1	XP_033732329.1
OG0004728	K	BL23415	g14731.t1	g14441.t1	g26773.t1	g5087.t1	g20657.t1	g18049.t1	g9654.t1	XP_033739578.1
OG0004729	G	BL09180	g2931.t1	g12848.t1	g28955.t1	g129.t1	g1201.t3	g601.t1	g4059.t1	XP_033748820.1
OG0004730	B1	BL22841	g9368.t1	g5133.t1	g20610.t1	g17027.t2	g7122.t1	g4081.t1	g22187.t1	XP_033762033.1
OG0004731	A1a	BL01761	g16485.t1	g29263.t1	g4975.t1	g10940.t1	g19420.t1	g12383.t1	g5773.t1	XP_033734146.1
OG0004732	B1	BL04214	g4875.t1	g15089.t1	g11366.t2	g15948.t3	g12214.t2	g6885.t3	g22558.t1	XP_033761447.1
OG0004733	K	BL23482	g17832.t1	g11986.t1	g18370.t1	g4491.t1	g23736.t1	g21210.t1	g4461.t1	XP_033740699.1
OG0004734	F	BL02938	g13477.t1	g24491.t1	g21934.t1	g13192.t1	g25164.t1	g18937.t1	g13936.t1	XP_033744076.1
OG0004735	D	BL12867	g5247.t1	g14307.t1	g10902.t1	g14266.t1	g9661.t1	g6493.t1	g17582.t1	XP_033755276.1
OG0004736	F	BL03100	g12359.t1	g24295.t1	g23349.t1	g12117.t1	g25614.t1	g20007.t1	g14859.t1	XP_033743179.1
OG0004737	A1a	BL01341	g10394.t2	g29265.t1	g2084.t1	g9692.t1	g16376.t1	g15051.t1	g6051.t1	XP_033734586.1
OG0004738	Ea	BL27757	g4780.t1	g13663.t1	g11190.t1	g17611.t1	g11356.t1	g6778.t1	g11381.t1	XP_033746360.1
OG0004739	H	BL24854	g8002.t2	g1835.t1	g14871.t1	g9398.t1	g3749.t1	g10108.t2	g522.t1	XP_033739429.1
OG0004740	F	BL22569	g19169.t1	g17099.t1	g7743.t1	g13583.t1	g12697.t1	g16341.t1	g13875.t2	XP_033743094.1
OG0004741	D	BL03622	g8125.t1	g13398.t1	g15276.t1	g14015.t1	g5469.t1	g10037.t1	g17671.t1	XP_033754995.1
OG0004742	C1	BL07380	g6704.t1	g6987.t1	g14487.t1	g2427.t1	g5142.t2	g11073.t1	g3363.t1	XP_033749855.1
OG0004743	A2	BL00784	g2398.t1	g23186.t1	g23912.t2	g20887.t1	g1850.t1	g1805.t1	g24882.t1	XP_033757951.1
OG0004744	C1	BL07951	g8541.t1	g18638.t1	g17154.t2	g3747.t2	g5845.t2	g7944.t2	g3756.t2	XP_033749780.1
OG0004745	Eb	BL27620	g1676.t1	g19882.t1	g25303.t2	g17935.t2	g3287.t1	g3297.t1	g11226.t1	XP_033746327.1
OG0004746	G	BL20074	g2679.t2	g16225.t1	g28681.t1	g4706.t1	g2484.t1	g1658.t1	g4090.t1	XP_033747853.1
OG0004747	C1	BL07195	g4616.t1	g15829.t1	g11058.t1	g5076.t1	g11961.t1	g7894.t1	g2613.t1	XP_033749155.1
OG0004748	D	BL10407	g5908.t1	g4327.t1	g11810.t1	g15037.t1	g10384.t1	g7078.t1	g17810.t2	XP_033753933.1
OG0004749	A1b	BL22411	g11627.t2	g25766.t1	g4163.t1	g8170.t1	g14763.t1	g14589.t1	g4632.t1	XP_033734955.1
OG0004750	C1	BL07922	g4941.t1	g5101.t1	g10282.t1	g2256.t1	g9695.t1	g6186.t1	g2018.t1	XP_033750353.1
OG0004751	B2	BL11159	g5178.t1	g7754.t1	g11516.t1	g21034.t2	g10000.t1	g6892.t1	g19111.t1	XP_033733125.1
OG0004753	K	BL13637	g14841.t1	g18298.t1	g26915.t1	g4519.t1	g20724.t1	g17975.t1	g8486.t1	XP_033740366.1
OG0004754	A1b	BL01313	g11714.t1	g26396.t1	g4771.t1	g9459.t1	g16522.t1	g14369.t2	g5983.t1	XP_033734360.1
OG0004755	R	BL11381	g2108.t4	g10208.t1	g23812.t1	g3513.t2	g1287.t1	g2003.t1	g12747.t1	XP_033752470.1
OG0004756	A1b	BL00607	g15905.t1	g19251.t1	g6399.t1	g7554.t1	g19282.t2	g11686.t1	g5641.t1	XP_033733916.1
OG0004757	R	BL14991	g2113.t1	g11809.t1	g23817.t1	g5441.t2	g1292.t1	g2008.t1	g12555.t1	XP_033752279.1
OG0004758	A1a	BL01350	g11424.t1	g19201.t1	g2620.t2	g8211.t1	g15168.t2	g14841.t2	g4825.t1	XP_033734451.1
OG0004760	F	BL02744	g12835.t1	g25580.t1	g23582.t1	g12310.t1	g24051.t1	g20184.t1	g15019.t1	XP_033743428.1
OG0004761	C1	BL07793	g4764.t1	g7658.t1	g11201.t1	g1230.t1	g11704.t2	g6769.t1	g2101.t1	XP_033749178.1
OG0004762	J1	BL17745	g578.t1	g3815.t1	g25004.t1	g22645.t1	g2043.t1	g2570.t1	g25274.t1	XP_033726814.1
OG0004763	C1	BL07115	g2308.t1	g17996.t1	g29994.t1	g3880.t4	g683.t1	g1302.t1	g3430.t1	XP_033750852.1
OG0004765	M	BL18123	g6223.t1	g3410.t1	g12449.t1	g11503.t1	g9914.t1	g7556.t1	g24058.t1	XP_033730161.1
OG0004766	N	BL25874	g18419.t1	g17179.t1	g9027.t1	g6535.t2	g14125.t3	g15892.t1	g15304.t1	XP_033759672.1
OG0004767	A1a	BL00758	g16211.t1	g18049.t1	g5315.t1	g8138.t1	g19256.t1	g12229.t1	g5572.t1	XP_033735273.1
OG0004768	P	BL14254	g13101.t1	g25134.t1	g21764.t1	g23052.t1	g24504.t1	g18961.t1	g18549.t1	XP_033764151.1
OG0004769	A1a	BL00619	g15919.t1	g25784.t1	g6877.t1	g8340.t1	g19675.t2	g11344.t1	g5885.t1	XP_033735133.1
OG0004770	D	BL05556	g3318.t1	g15297.t1	g28198.t1	g15213.t1	g569.t1	g1265.t1	g17879.t1	XP_033754111.1
OG0004771	A1a	BL01442	g11499.t1	g17975.t2	g4520.t2	g7520.t1	g15261.t2	g14146.t1	g5676.t1	XP_033735413.1
OG0004772	B2	BL19799	g4082.t2	g26743.t1	g10283.t1	g20189.t1	g11818.t1	g6185.t1	g19228.t1	XP_033732939.1
OG0004773	A1b	BL23168	g10767.t1	g19288.t1	g2992.t1	g9452.t1	g14638.t2	g14561.t1	g5805.t2	XP_033736355.1
OG0004774	G	BL19140	g2807.t1	g19161.t1	g28392.t1	g3237.t1	g449.t1	g1130.t1	g2390.t1	XP_033748772.1
OG0004776	P	BL14017	g14181.t1	g27619.t1	g26724.t1	g23040.t1	g21926.t2	g18016.t1	g17935.t1	XP_033764119.1
OG0004777	D	BL12034	g2140.t1	g15229.t1	g23841.t1	g14600.t1	g1798.t1	g2043.t1	g17345.t1	XP_033754797.1
OG0004778	H	BL19213	g9036.t1	g1740.t1	g18988.t1	g11156.t2	g7335.t1	g5409.t1	g501.t1	XP_033745761.1
OG0004779	C1	BL07111	g7213.t1	g27049.t1	g15451.t1	g3621.t1	g4802.t1	g8131.t1	g2515.t1	XP_033749164.1
OG0004780	L	BL05865	g1497.t1	g20782.t1	g24016.t1	g2144.t1	g1485.t1	g1868.t1	g7015.t1	XP_033738759.1
OG0004781	B3	BL08789	g5871.t1	g4745.t1	g11672.t1	g8333.t1	g9472.t1	g7059.t1	g21531.t1	XP_033728000.1
OG0004782	Qd	BL15328	g992.t1	g62.t1	g24105.t2	g7582.t2	g685.t1	g1703.t1	g1252.t2	XP_033742903.1
OG0004783	A1b	BL01247	g11768.t1	g29436.t1	g4182.t1	g8322.t1	g15823.t1	g14295.t1	g5466.t2	XP_033734542.1
OG0004784	L	BL06115	g16452.t1	g27295.t1	g6478.t1	g1397.t1	g19771.t1	g11536.t1	g6583.t1	XP_033738131.1
OG0004785	A1a	BL01212	g10489.t1	g19425.t1	g2302.t1	g9694.t2	g14815.t1	g15089.t1	g4629.t1	XP_033733887.1
OG0004786	J2	BL07653	g2637.t1	g2508.t1	g29298.t1	g4283.t1	g1759.t1	g797.t1	g6858.t1	XP_033737426.1
OG0004787	Ea	BL27765	g4059.t1	g8186.t1	g9977.t1	g19256.t1	g12060.t1	g6042.t1	g11722.t1	XP_033746561.1
OG0004788	A1a	BL01230	g16585.t1	g25779.t1	g4904.t2	g9082.t2	g19845.t2	g12133.t1	g4503.t1	XP_033735829.1
OG0004790	A1b	BL12995	g10409.t1	g26103.t1	g1970.t1	g8838.t1	g15681.t1	g15180.t1	g6111.t1	XP_033734264.1
OG0004791	A1b	BL01164	g16553.t1	g19318.t1	g5428.t1	g7921.t2	g19878.t1	g12069.t1	g5671.t1	XP_033734705.1
OG0004792	J1	BL06776	g2690.t1	g9949.t1	g28225.t1	g22393.t1	g88.t1	g1171.t1	g25621.t3	XP_033727041.1
OG0004793	A1a	BL01605	g11059.t1	g17970.t1	g2386.t1	g8754.t2	g16630.t1	g15235.t1	g6095.t1	XP_033736295.1
OG0004794	O1	BL23955	g6457.t1	g1463.t1	g14633.t1	g4643.t1	g6322.t1	g10945.t1	g13692.t1	XP_033751667.1
OG0004795	P	BL14514	g12850.t1	g11883.t1	g23069.t1	g23492.t1	g24510.t1	g19996.t1	g18790.t1	XP_033724800.1
OG0004796	Ea	BL28067	g7405.t1	g6007.t1	g15724.t1	g17651.t2	g5970.t1	g8502.t1	g11251.t1	XP_033746369.1
OG0004797	C1	BL07415	g3607.t1	g7529.t1	g28494.t1	g1697.t1	g1442.t1	g880.t1	g2164.t1	XP_033749898.1
OG0004798	I	BL21709	g2408.t1	g1799.t1	g23920.t1	g5696.t1	g1860.t1	g1770.t1	g9897.t1	XP_033756468.1
OG0004799	O1	BL24041	g2959.t2	g23019.t1	g29502.t2	g5399.t1	g1143.t1	g1355.t2	g13170.t2	XP_033753101.1
OG0004800	F	BL02874	g13569.t1	g24424.t1	g22134.t1	g13038.t1	g25747.t1	g19117.t1	g14918.t1	XP_033743242.1
OG0004801	J2	BL07330	g5887.t1	g10846.t2	g11648.t1	g4014.t3	g9897.t1	g7043.t2	g7935.t6	XP_033738671.1
OG0004802	D	BL05450	g5869.t1	g4458.t1	g11699.t1	g13962.t1	g11107.t1	g6831.t1	g16606.t1	XP_033753920.1
OG0004803	A1a	BL25546	g11560.t1	g17388.t1	g3457.t1	g7805.t1	g14847.t1	g13813.t1	g4819.t1	XP_033736346.1
OG0004804	A2	BL01927	g9145.t3	g1297.t1	g19022.t1	g20594.t1	g6676.t4	g5385.t1	g25181.t1	XP_033757969.1
OG0004805	G	BL03957	g4358.t2	g7052.t1	g10479.t2	g2331.t1	g10998.t1	g6289.t1	g2337.t1	XP_033747384.1
OG0004806	G	BL20460	g1134.t1	g19979.t1	g25037.t1	g343.t1	g694.t1	g2542.t1	g2266.t1	XP_033748176.1
OG0004807	I	BL21315	g5766.t1	g9943.t2	g11590.t1	g5188.t1	g10037.t1	g6991.t1	g9972.t1	XP_033756604.1
OG0004808	M	BL18246	g10503.t1	g23668.t1	g2318.t2	g12370.t2	g14929.t2	g15147.t2	g23742.t2	XP_033732109.1
OG0004809	M	BL26989	g19846.t1	g23876.t1	g12680.t1	g11244.t1	g17931.t1	g13655.t1	g24067.t2	XP_033764132.1
OG0004810	B1	BL16084	g5513.t1	g4334.t1	g12011.t1	g16851.t1	g11415.t1	g7435.t1	g11387.t1	XP_033761465.1
OG0004811	I	BL21511	g517.t1	g2312.t1	g24820.t1	g5918.t1	g3043.t1	g2720.t1	g10646.t1	XP_033756305.1
OG0004812	A1a	BL01922	g10525.t1	g28847.t1	g3060.t3	g7632.t1	g15878.t3	g14474.t1	g4432.t1	XP_033735164.1
OG0004813	D	BL05007	g3859.t1	g7820.t1	g9817.t1	g15801.t1	g12330.t1	g5718.t2	g17842.t1	XP_033753795.1
OG0004814	Ea	BL17517	g6112.t1	g12530.t1	g12494.t1	g18345.t1	g10506.t2	g7594.t1	g11616.t2	XP_033745177.1
OG0004815	Qa	BL14949	g6324.t1	g22380.t1	g17103.t1	g7833.t1	g4752.t1	g7989.t1	g1696.t1	XP_033746146.1
OG0004816	A1b	BL22420	g11079.t1	g17652.t1	g2507.t1	g7924.t2	g15458.t1	g14805.t1	g4521.t2	XP_033733829.1
OG0004817	G	BL20734	g3188.t1	g15411.t1	g28701.t1	g2225.t1	g1033.t1	g1668.t1	g2364.t1	XP_033747415.1
OG0004818	G	BL20083	g4416.t1	g8057.t1	g10136.t1	g4069.t1	g10301.t1	g5806.t1	g2762.t1	XP_033748289.1
OG0004819	Ea	BL09253	g387.t1	g4564.t1	g25635.t1	g19444.t1	g1933.t1	g3080.t1	g11198.t1	XP_033746034.1
OG0004820	K	BL00039	g14652.t1	g14170.t2	g27187.t3	g941.t2	g21649.t5	g17642.t1	g8252.t1	XP_033740003.1
OG0004821	Ea	BL27988	g5846.t1	g7053.t1	g12256.t1	g19312.t1	g10971.t1	g7727.t1	g11878.t1	XP_033744393.1
OG0004822	G	BL19120	g2907.t1	g26824.t1	g28983.t1	g5589.t1	g2520.t1	g626.t1	g3933.t1	XP_033748893.1
OG0004823	M	BL21279	g19643.t1	g4130.t1	g12803.t1	g11444.t1	g16688.t1	g13498.t1	g23900.t1	XP_033732658.1
OG0004824	Eb	BL11938	g4520.t1	g7096.t1	g10358.t1	g19217.t1	g12103.t1	g6124.t1	g11519.t1	XP_033745928.1
OG0004825	H	BL24915	g1907.t1	g20543.t1	g29641.t1	g10888.t2	g1331.t1	g1448.t1	g1391.t1	XP_033741985.1
OG0004826	M	BL18252	g13740.t1	g4000.t1	g27580.t1	g12357.t1	g20352.t6	g17905.t1	g24334.t1	XP_033763117.1
OG0004827	F	BL02973	g18384.t1	g16708.t1	g8764.t1	g13028.t1	g13883.t1	g15864.t1	g14737.t1	XP_033742261.1
OG0004829	B2	BL11151	g6075.t2	g7107.t1	g12071.t1	g21028.t1	g10841.t2	g7378.t1	g19474.t6	XP_033733126.1
OG0004830	N	BL26108	g19096.t4	g20316.t1	g7907.t1	g6046.t3	g12762.t1	g16375.t1	g16331.t2	XP_033759742.1
OG0004831	G	BL20396	g5034.t1	g6080.t1	g11483.t1	g5048.t1	g11468.t2	g6918.t1	g2696.t1	XP_033747466.1
OG0004832	D	BL19708	g3492.t1	g27038.t1	g28868.t1	g15272.t2	g3364.t2	g530.t1	g17605.t1	XP_033754392.1
OG0004833	A1a	BL14707	g11081.t1	g25734.t1	g2509.t1	g9118.t1	g15565.t1	g14803.t1	g4765.t1	XP_033734144.1
OG0004834	F	BL02890	g18423.t1	g24106.t1	g7315.t2	g12065.t5	g12950.t1	g16772.t1	g14040.t5	XP_033742708.1
OG0004835	D	BL05025	g16724.t1	g7446.t1	g5524.t1	g15195.t1	g18144.t1	g11930.t1	g16689.t1	XP_033754508.1
OG0004836	M	BL11716	g20005.t1	g22615.t1	g14193.t2	g12663.t1	g18041.t2	g12578.t1	g23883.t1	XP_033732612.1
OG0004837	B2	BL19781	g1878.t1	g12863.t1	g28620.t1	g20366.t1	g2144.t1	g991.t1	g19326.t1	XP_033733237.1
OG0004838	J1	BL08506	g7786.t1	g272.t1	g17042.t1	g21567.t1	g4001.t1	g8760.t1	g25547.t1	XP_033726536.1
OG0004839	B1	BL04385	g9512.t1	g15166.t1	g19610.t1	g17093.t1	g6715.t1	g4604.t1	g22278.t1	XP_033762188.1
OG0004840	A1a	BL00675	g11823.t1	g19482.t1	g3982.t1	g9613.t1	g15041.t1	g13746.t1	g5537.t1	XP_033734923.1
OG0004841	M	BL18182	g20430.t1	g23470.t1	g13655.t1	g12867.t1	g17204.t1	g13404.t1	g23975.t2	XP_033732602.1
OG0004842	H	BL24969	g3151.t2	g9950.t1	g29117.t1	g8471.t1	g1177.t1	g472.t1	g410.t1	XP_033737694.1
OG0004843	Qa	BL22875	g7798.t1	g9923.t1	g17032.t1	g9955.t3	g4892.t1	g8749.t1	g479.t3	XP_033750472.1
OG0004844	J2	BL11001	g5192.t1	g1697.t1	g10766.t1	g634.t1	g10690.t2	g6379.t1	g6525.t1	XP_033737453.1
OG0004845	C1	BL07302	g7083.t1	g19088.t1	g16413.t1	g2044.t4	g4195.t1	g9013.t1	g3830.t2	XP_033750020.1
OG0004846	Ea	BL28001	g2075.t1	g11459.t1	g29659.t1	g18922.t2	g1263.t1	g1460.t1	g12347.t2	XP_033745192.1
OG0004847	A2	BL14691	g8027.t1	g22475.t1	g14824.t1	g20834.t1	g5240.t1	g10132.t1	g24772.t1	XP_033758537.1
OG0004848	G	BL20386	g3734.t1	g5310.t1	g9835.t1	g2953.t3	g10459.t1	g5757.t1	g3649.t1	XP_033748195.1
OG0004849	H	BL19611	g7573.t1	g341.t1	g15984.t1	g9876.t1	g4642.t1	g8689.t1	g298.t1	XP_033745597.1
OG0004850	I	BL10093	g806.t1	g10715.t1	g24697.t1	g5516.t1	g508.t1	g2336.t1	g9820.t1	XP_033756845.1
OG0004851	J1	BL06752	g945.t1	g21952.t1	g24211.t1	g22624.t1	g2539.t1	g2143.t1	g25610.t1	XP_033727567.1
OG0004852	D	BL10339	g4113.t1	g13478.t1	g9683.t1	g15556.t1	g10167.t1	g5643.t1	g17862.t1	XP_033754551.1
OG0004853	H	BL02441	g7285.t1	g2846.t1	g15646.t1	g9336.t1	g4688.t1	g8484.t1	g281.t1	XP_033751750.1
OG0004855	A1a	BL01852	g16363.t1	g25759.t1	g6377.t1	g8746.t1	g18411.t1	g11661.t1	g6234.t1	XP_033735527.1
OG0004856	L	BL06322	g761.t1	g10609.t1	g24640.t1	g2892.t1	g2663.t1	g2374.t1	g6703.t1	XP_033737048.1
OG0004857	O2	BL23774	g17239.t1	g13372.t2	g18786.t1	g1551.t1	g22583.t2	g20930.t1	g9329.t1	XP_033739679.1
OG0004858	H	BL12836	g5380.t1	g2834.t1	g11900.t2	g10723.t1	g11435.t1	g7097.t1	g69.t1	XP_033750976.1
OG0004860	Eb	BL23897	g6130.t1	g13905.t1	g11742.t1	g18658.t1	g10139.t1	g7255.t1	g11773.t1	XP_033745197.1
OG0004861	C1	BL07909	g5399.t1	g8540.t1	g11887.t1	g4597.t2	g11858.t1	g7173.t1	g3982.t1	XP_033749935.1
OG0004862	A2	BL01634	g4642.t1	g1883.t1	g11109.t1	g20216.t1	g12189.t1	g7866.t1	g25182.t1	XP_033757948.1
OG0004863	Ea	BL28052	g5616.t2	g13766.t1	g12419.t1	g18901.t1	g9845.t1	g7532.t1	g12266.t2	XP_033746006.1
OG0004864	L	BL05888	g11567.t1	g20374.t1	g3466.t1	g545.t1	g14514.t1	g13820.t1	g7753.t1	XP_033736876.1
OG0004865	Ea	BL27948	g2080.t1	g18633.t1	g29653.t1	g17904.t2	g1267.t1	g1456.t1	g12411.t1	XP_033744844.1
OG0004866	M	BL26888	g18656.t1	g23709.t1	g7295.t1	g12212.t1	g12730.t1	g16691.t1	g23971.t1	XP_033731274.1
OG0004867	J1	BL17710	g9932.t1	g10810.t1	g21080.t1	g21805.t1	g8839.t1	g3813.t1	g25337.t1	XP_033727766.1
OG0004868	H	BL19246	g725.t1	g2038.t1	g25492.t1	g8283.t1	g2244.t1	g3165.t1	g218.t1	XP_033754235.1
OG0004869	Ea	BL27964	g3956.t2	g18830.t1	g10157.t5	g19045.t1	g10978.t1	g5876.t1	g11530.t1	XP_033746194.1
OG0004871	F	BL03015	g7812.t1	g24245.t1	g17017.t1	g13522.t1	g5720.t2	g8736.t1	g14926.t2	XP_033743298.1
OG0004872	C1	BL07383	g8037.t1	g14002.t1	g14803.t1	g5673.t1	g4399.t1	g10100.t1	g3516.t1	XP_033750403.1
OG0004873	P	BL04900	g14616.t1	g12222.t1	g27132.t1	g23956.t1	g21865.t1	g18105.t1	g18530.t3	XP_033763183.1
OG0004874	F	BL03052	g12766.t1	g25077.t1	g22390.t1	g11817.t1	g24975.t1	g18652.t1	g14840.t1	XP_033743133.1
OG0004875	F	BL26542	g18645.t1	g25498.t1	g7188.t1	g12554.t1	g12701.t1	g16470.t1	g14709.t1	XP_033743781.1
OG0004876	C1	BL07295	g4515.t1	g8903.t1	g10625.t1	g2497.t1	g11842.t1	g6596.t1	g4049.t1	XP_033749402.1
OG0004877	L	BL06156	g7412.t1	g10868.t1	g15732.t1	g1372.t1	g5976.t1	g8511.t1	g6787.t1	XP_033738115.1
OG0004878	H	BL19276	g4715.t1	g22053.t1	g10788.t1	g8523.t1	g11621.t1	g6401.t2	g392.t1	XP_033750100.1
OG0004879	H	BL19602	g3224.t1	g21604.t1	g28741.t1	g10318.t1	g2837.t1	g335.t1	g394.t2	XP_033741049.1
OG0004880	D	BL19697	g3994.t3	g26819.t1	g10243.t5	g15702.t4	g10467.t2	g6063.t2	g17332.t1	XP_033755908.1
OG0004881	F	BL22604	g12146.t3	g16901.t1	g22502.t3	g12266.t4	g24009.t5	g19332.t1	g13954.t1	XP_033743590.1
OG0004882	B2	BL10609	g2488.t1	g13955.t2	g23780.t1	g20394.t1	g915.t1	g1963.t1	g19200.t1	XP_033724550.1
OG0004883	H	BL19214	g1596.t1	g10060.t1	g25201.t1	g9658.t1	g1707.t1	g3403.t1	g494.t1	XP_033735211.1
OG0004884	L	BL06138	g15034.t1	g14253.t1	g26519.t1	g1470.t1	g22065.t1	g18309.t1	g6458.t1	XP_033736884.1
OG0004885	Eb	BL27624	g2079.t1	g18632.t1	g29654.t1	g18600.t1	g1266.t3	g1457.t1	g12265.t1	XP_033744475.1
OG0004886	Qc	BL14793	g704.t1	g21813.t1	g25512.t1	g10779.t1	g3448.t1	g3146.t1	g1314.t1	XP_033751822.1
OG0004887	C2	BL15470	g12101.t1	g20037.t1	g3550.t1	g9169.t1	g14897.t1	g14608.t1	g20204.t1	XP_033725504.1
OG0004888	N	BL26051	g13689.t1	g25631.t1	g21397.t1	g6083.t2	g24476.t1	g19181.t1	g16229.t1	XP_033760900.1
OG0004889	M	BL18055	g20075.t1	g4168.t1	g13984.t3	g12858.t1	g17363.t1	g12561.t4	g24019.t1	XP_033728497.1
OG0004890	H	BL24751	g181.t1	g22180.t1	g25773.t1	g8793.t1	g3137.t1	g2990.t1	g1449.t1	XP_033735251.1
OG0004891	G	BL24226	g522.t1	g18562.t1	g24811.t1	g2484.t2	g2746.t1	g2724.t1	g3381.t1	XP_033748710.1
OG0004892	H	BL12796	g3290.t2	g10930.t1	g29345.t2	g10963.t2	g1058.t1	g834.t1	g1287.t3	XP_033753061.1
OG0004893	F	BL22614	g561.t1	g13575.t1	g25015.t1	g12421.t1	g2029.t1	g2561.t1	g14848.t1	XP_033743407.1
OG0004894	Ea	BL09336	g4939.t1	g5113.t1	g10280.t1	g19068.t1	g9693.t1	g6188.t1	g11463.t2	XP_033746733.1
OG0004895	B2	BL11103	g11070.t1	g16052.t1	g2634.t1	g20576.t1	g14787.t1	g13873.t1	g19190.t1	XP_033724683.1
OG0004896	C1	BL25176	g2515.t1	g18569.t1	g23785.t1	g4378.t1	g908.t1	g1968.t4	g4021.t1	XP_033749223.1
OG0004897	H	BL19592	g943.t1	g21956.t2	g24213.t5	g7960.t1	g2541.t2	g2142.t2	g283.t1	XP_033751700.1
OG0004898	B2	BL11088	g2743.t1	g13832.t1	g28309.t1	g20083.t1	g157.t2	g1234.t1	g19173.t1	XP_033733117.1
OG0004899	N	BL16400	g12139.t1	g9231.t1	g22508.t1	g7154.t1	g24014.t1	g19325.t1	g15571.t1	XP_033759402.1
OG0004900	B2	BL11241	g3703.t1	g6948.t1	g9628.t1	g20485.t1	g11334.t1	g5598.t1	g19206.t1	XP_033732049.1
OG0004901	L	BL03710	g17689.t1	g274.t1	g18327.t1	g4846.t1	g22766.t1	g21086.t1	g7415.t1	XP_033737843.1
OG0004902	G	BL20199	g6165.t1	g15723.t1	g11702.t1	g3952.t1	g11104.t1	g6835.t1	g2373.t1	XP_033748063.1
OG0004903	B1	BL10209	g5606.t1	g27253.t2	g12435.t2	g17488.t4	g10217.t2	g7541.t1	g23153.t1	XP_033761721.1
OG0004904	J2	BL07018	g3055.t1	g20931.t1	g29237.t1	g3104.t1	g2895.t1	g741.t1	g7506.t1	XP_033738693.1
OG0004905	J2	BL06899	g4089.t1	g20646.t1	g9729.t1	g1413.t1	g11078.t1	g5692.t1	g7660.t1	XP_033736684.1
OG0004906	N	BL21073	g4803.t1	g25035.t1	g11167.t1	g6697.t2	g10374.t1	g6797.t1	g16131.t1	XP_033760420.1
OG0004907	H	BL24755	g3759.t1	g9807.t1	g10022.t1	g9025.t1	g12319.t1	g5997.t1	g4372.t1	XP_033752487.1
OG0004908	N	BL17897	g13356.t2	g24201.t2	g22569.t2	g6848.t1	g24182.t3	g19818.t1	g15360.t3	XP_033760973.1
OG0004909	F	BL24569	g10475.t1	g24141.t1	g1977.t1	g13239.t1	g15690.t1	g15187.t1	g15131.t1	XP_033742311.1
OG0004910	L	BL03698	g4355.t1	g21100.t1	g10476.t1	g5462.t1	g11005.t1	g6294.t1	g6419.t1	XP_033738403.1
OG0004911	L	BL03685	g8065.t1	g1403.t1	g14729.t1	g2862.t1	g3836.t1	g10849.t1	g6462.t1	XP_033737967.1
OG0004912	D	BL12022	g3837.t1	g5760.t1	g9599.t1	g15047.t1	g10483.t1	g5578.t1	g17885.t1	XP_033754794.1
OG0004913	C1	BL05647	g1563.t1	g4952.t1	g25168.t1	g4984.t1	g462.t1	g3429.t1	g2275.t1	XP_033750701.1
OG0004914	L	BL05863	g5577.t1	g16206.t1	g11765.t1	g5684.t1	g10316.t1	g7620.t1	g6390.t1	XP_033736661.1
OG0004916	K	BL20940	g13746.t1	g18411.t1	g27711.t1	g1045.t1	g20254.t1	g17908.t1	g9219.t1	XP_033739779.1
OG0004917	B1	BL16090	g5043.t1	g6862.t1	g11473.t1	g16779.t1	g10125.t1	g6929.t1	g23122.t1	XP_033762114.1
OG0004918	A1a	BL01617	g10468.t1	g26030.t1	g2877.t2	g7977.t1	g16649.t1	g14872.t1	g6144.t1	XP_033734671.1
OG0004919	L	BL06155	g17381.t1	g27769.t1	g18876.t1	g1373.t1	g23566.t1	g21319.t1	g6788.t2	XP_033738113.1
OG0004920	F	BL02877	g12462.t1	g24881.t1	g22670.t1	g12170.t2	g25315.t1	g19584.t1	g13981.t2	XP_033742603.1
OG0004923	F	BL26581	g18429.t1	g17137.t1	g9394.t1	g13568.t1	g16211.t1	g16041.t1	g15031.t1	XP_033742422.1
OG0004924	L	BL06376	g7836.t1	g9628.t1	g16674.t1	g3891.t1	g6248.t1	g8866.t1	g7556.t1	XP_033738188.1
OG0004925	A1a	BL01780	g16786.t1	g17643.t1	g5133.t1	g9228.t1	g18382.t1	g12283.t1	g6105.t1	XP_033735095.1
OG0004926	Ea	BL27598	g4558.t1	g4719.t1	g11571.t1	g18606.t1	g11424.t1	g6976.t1	g12388.t1	XP_033746027.1
OG0004927	A1a	BL00608	g10619.t1	g4131.t1	g18069.t1	g7555.t1	g15562.t1	g20313.t1	g5640.t1	XP_033733915.1
OG0004928	G	BL04084	g5031.t1	g6086.t1	g11486.t1	g5046.t1	g11465.t1	g6914.t1	g3691.t1	XP_033731555.1
OG0004929	O1	BL09657	g4249.t1	g1263.t1	g9871.t4	g4115.t3	g12419.t2	g5799.t3	g12707.t2	XP_033752422.1
OG0004930	Qa	BL14904	g305.t1	g9789.t1	g26000.t1	g8002.t1	g2062.t1	g2940.t1	g1172.t1	XP_033752659.1
OG0004931	A1a	BL01851	g12018.t2	g26183.t1	g3637.t1	g8459.t3	g15489.t1	g14761.t2	g5583.t1	XP_033734333.1
OG0004932	F	BL03041	g18425.t1	g9126.t1	g9410.t1	g11872.t1	g13895.t1	g16046.t1	g14639.t1	XP_033742310.1
OG0004933	D	BL03598	g7469.t1	g13699.t1	g16150.t1	g13951.t1	g6564.t1	g8671.t1	g16665.t3	XP_033753888.1
OG0004935	P	BL14513	g17810.t1	g12033.t1	g18348.t1	g23525.t1	g23504.t1	g21185.t1	g18511.t1	XP_033763902.1
OG0004936	B2	BL11128	g9905.t1	g15457.t1	g19563.t1	g19675.t1	g9307.t1	g5022.t1	g19144.t1	XP_033732897.1
OG0004937	I	BL21814	g1407.t1	g1904.t1	g24357.t1	g5375.t1	g2622.t3	g2199.t1	g9952.t1	XP_033757473.1
OG0004938	Ea	BL09404	g3356.t1	g5748.t1	g29432.t2	g19395.t1	g409.t1	g1045.t1	g11359.t1	XP_033744350.1
OG0004939	A1a	BL00667	g10855.t2	g25807.t1	g2592.t1	g8260.t1	g15483.t1	g14843.t2	g4454.t1	XP_033733841.1
OG0004941	B2	BL10581	g4835.t1	g18538.t1	g11328.t1	g21204.t1	g9458.t1	g7862.t1	g19098.t1	XP_033732962.1
OG0004942	G	BL03937	g3747.t1	g19144.t1	g9981.t1	g1680.t1	g12055.t1	g6029.t1	g3564.t1	XP_033747889.1
OG0004943	H	BL24772	g4627.t1	g20571.t1	g11061.t1	g10141.t1	g11951.t1	g7885.t1	g883.t1	XP_033753165.1
OG0004944	C1	BL03263	g9543.t1	g7911.t1	g20279.t1	g2655.t2	g7065.t2	g4102.t1	g3515.t1	XP_033749819.1
OG0004945	B3	BL04632	g9282.t1	g15071.t1	g20105.t1	g10251.t1	g6733.t1	g4542.t1	g21911.t1	XP_033728327.1
OG0004946	D	BL19715	g4980.t1	g12744.t1	g11301.t1	g15740.t1	g11905.t1	g6729.t1	g17874.t1	XP_033754672.1
OG0004947	N	BL22775	g12990.t1	g25431.t1	g21499.t1	g6338.t3	g24714.t1	g19209.t1	g15740.t1	XP_033760735.1
OG0004949	N	BL25912	g12715.t2	g23984.t1	g22004.t1	g6943.t1	g24964.t1	g18750.t2	g15266.t1	XP_033760970.1
OG0004950	A1b	BL01254	g10580.t1	g19391.t1	g1838.t1	g8895.t2	g16398.t1	g15359.t1	g4793.t1	XP_033735158.1
OG0004951	D	BL19691	g2960.t1	g8606.t1	g29503.t1	g14596.t1	g1724.t1	g1356.t1	g17221.t1	XP_033755059.1
OG0004952	Ea	BL15993	g2649.t1	g12908.t1	g29312.t1	g19446.t1	g737.t1	g806.t1	g12198.t1	XP_033745017.1
OG0004953	G	BL20456	g10066.t1	g8902.t1	g20650.t1	g397.t1	g8681.t1	g3718.t1	g4082.t1	XP_033747350.1
OG0004954	O2	BL25495	g14599.t1	g12083.t1	g27788.t1	g3693.t1	g20029.t1	g16947.t1	g8697.t1	XP_033740270.1
OG0004955	Eb	BL27552	g5880.t1	g15222.t1	g11662.t1	g18351.t1	g9905.t1	g7050.t1	g12455.t1	XP_033745273.1
OG0004956	L	BL06254	g949.t1	g10476.t1	g24201.t1	g5720.t1	g1885.t1	g2126.t1	g7420.t1	XP_033736879.1
OG0004957	P	BL14249	g17441.t1	g13226.t1	g17516.t1	g23309.t1	g23311.t1	g20825.t1	g18708.t1	XP_033724639.1
OG0004958	A1a	BL22489	g11989.t1	g29840.t1	g3278.t1	g7822.t1	g15300.t1	g14232.t1	g4351.t1	XP_033734331.1
OG0004959	G	BL20255	g4894.t1	g7987.t1	g11401.t1	g1632.t1	g10355.t1	g6866.t1	g3739.t1	XP_033748094.1
OG0004961	G	BL04033	g4088.t1	g15243.t1	g9730.t1	g4687.t1	g11077.t1	g5691.t1	g3633.t1	XP_033747995.1
OG0004962	N	BL13981	g19185.t1	g16485.t1	g8148.t1	g7368.t1	g14271.t1	g16217.t1	g15428.t2	XP_033759362.1
OG0004963	A1a	BL01823	g13373.t1	g28903.t1	g22363.t1	g11192.t1	g24197.t1	g18661.t1	g5771.t1	XP_033735821.1
OG0004964	P	BL14377	g16049.t2	g16970.t1	g6568.t1	g22766.t2	g19184.t2	g11407.t1	g18798.t1	XP_033764071.1
OG0004965	D	BL05543	g3855.t1	g12764.t1	g10064.t1	g14109.t1	g10460.t1	g5948.t1	g16768.t1	XP_033755799.1
OG0004966	F	BL02710	g18959.t1	g24288.t1	g7854.t1	g13788.t1	g12662.t1	g16224.t1	g13992.t1	XP_033742110.1
OG0004967	D	BL05516	g4353.t1	g6564.t1	g10474.t1	g14017.t1	g11007.t1	g6296.t2	g17263.t1	XP_033755133.1
OG0004968	J1	BL03855	g5161.t1	g10472.t1	g11538.t1	g21291.t1	g11197.t1	g6946.t1	g26037.t1	XP_033727097.1
OG0004969	Eb	BL27436	g4150.t1	g8757.t1	g9805.t1	g17927.t1	g11090.t1	g5720.t1	g12390.t1	XP_033745671.1
OG0004970	C1	BL07457	g9442.t1	g19012.t1	g19755.t1	g5630.t1	g8252.t1	g4803.t2	g3662.t1	XP_033749419.1
OG0004971	I	BL21399	g163.t1	g2205.t1	g25763.t1	g2317.t1	g1130.t1	g3002.t1	g9907.t1	XP_033756104.1
OG0004972	K	BL13712	g15300.t1	g11816.t1	g26973.t1	g3665.t1	g20987.t1	g17357.t1	g8359.t1	XP_033740148.1
OG0004973	N	BL22815	g18937.t1	g9464.t1	g7245.t1	g6419.t1	g12553.t1	g16708.t1	g15506.t3	XP_033759894.1
OG0004974	A1a	BL01798	g11272.t1	g19415.t1	g4824.t1	g5913.t1	g15501.t1	g14407.t2	g6018.t1	XP_033735590.1
OG0004975	D	BL05279	g711.t1	g7794.t1	g25505.t1	g14262.t1	g3441.t1	g3153.t1	g16806.t1	XP_033755485.1
OG0004976	L	BL24307	g7186.t1	g9529.t2	g15417.t1	g4555.t1	g6531.t2	g8102.t1	g7792.t1	XP_033738730.1
OG0004977	B1	BL17298	g156.t1	g15345.t1	g25756.t1	g17026.t1	g839.t1	g3009.t1	g22583.t1	XP_033761703.1
OG0004978	B2	BL11247	g2761.t1	g12859.t1	g28656.t1	g20522.t1	g2505.t1	g1019.t1	g19536.t2	XP_033733088.1
OG0004979	A2	BL01911	g118.t1	g9543.t1	g26181.t1	g21195.t1	g374.t1	g2899.t1	g25179.t1	XP_033758534.1
OG0004980	B1	BL04340	g4924.t1	g5544.t1	g11432.t1	g16781.t1	g11777.t1	g7281.t1	g22649.t1	XP_033761463.1
OG0004981	Ea	BL11921	g3913.t1	g7358.t1	g10211.t1	g18064.t1	g11787.t1	g5836.t1	g11632.t1	XP_033745356.1
OG0004982	Ea	BL27641	g9485.t1	g6635.t1	g19585.t1	g18905.t1	g7588.t1	g4885.t1	g11467.t1	XP_033744954.1
OG0004983	G	BL10010	g4455.t1	g18989.t1	g10080.t1	g716.t3	g9628.t1	g5934.t1	g2959.t1	XP_033748140.1
OG0004984	J2	BL15892	g9344.t1	g10267.t1	g20462.t1	g5570.t1	g6708.t1	g3991.t1	g6528.t1	XP_033738564.1
OG0004985	N	BL10809	g13264.t1	g24265.t1	g21848.t1	g6633.t1	g24807.t1	g19253.t1	g15331.t1	XP_033759789.1
OG0004986	Eb	BL27549	g8501.t1	g5418.t1	g16472.t1	g18121.t1	g3639.t1	g8030.t1	g11522.t1	XP_033746728.1
OG0004987	H	BL19572	g850.t2	g22541.t1	g24750.t1	g7531.t2	g322.t1	g2440.t1	g1528.t1	XP_033740231.1
OG0004988	G	BL19993	g3043.t1	g5228.t1	g29248.t1	g4834.t1	g981.t1	g748.t1	g4063.t1	XP_033747490.1
OG0004989	A1a	BL01773	g11003.t1	g29381.t1	g2706.t1	g8945.t2	g16326.t1	g13906.t1	g4862.t1	XP_033734099.1
OG0004990	B1	BL12250	g10065.t1	g18964.t1	g20649.t1	g17484.t1	g8682.t1	g3719.t1	g22184.t1	XP_033762847.1
OG0004991	P	BL14463	g14739.t1	g12970.t1	g26782.t1	g22987.t1	g20234.t1	g17830.t1	g18717.t1	XP_033763128.1
OG0004992	O1	BL22062	g1110.t1	g11287.t1	g25059.t1	g1505.t1	g1519.t1	g2522.t1	g13560.t1	XP_033751641.1
OG0004993	J1	BL17716	g2918.t1	g22469.t2	g28969.t1	g22623.t1	g2531.t1	g617.t1	g25624.t1	XP_033727839.1
OG0004994	B2	BL11378	g4148.t1	g7372.t1	g9802.t1	g20191.t1	g11086.t1	g5724.t1	g19192.t2	XP_033726064.1
OG0004995	P	BL14300	g14679.t1	g14047.t1	g27049.t1	g23776.t1	g20021.t1	g17868.t1	g18076.t1	XP_033763827.1
OG0004996	G	BL04074	g9890.t1	g15312.t1	g20059.t1	g713.t1	g8081.t1	g4525.t1	g4013.t3	XP_033748769.1
OG0004997	O1	BL24004	g3320.t1	g2139.t1	g28193.t1	g5562.t1	g567.t1	g1267.t1	g24277.t1	XP_033751209.1
OG0004998	G	BL24250	g14556.t1	g4669.t1	g26861.t1	g1631.t1	g21908.t1	g17573.t1	g2937.t1	XP_033748089.1
OG0004999	Ea	BL12576	g5128.t1	g5611.t1	g10300.t1	g18151.t1	g11303.t1	g6173.t1	g11592.t1	XP_033746371.1
OG0005000	I	BL06726	g2589.t1	g20513.t1	g29595.t1	g3946.t2	g922.t1	g1417.t1	g10550.t1	XP_033756153.1
OG0005001	H	BL19494	g724.t2	g9652.t1	g25493.t1	g8284.t1	g2245.t1	g3164.t4	g339.t1	XP_033754843.1
OG0005002	G	BL04068	g4534.t1	g12576.t1	g10312.t1	g602.t1	g10136.t1	g6156.t1	g2469.t1	XP_033748722.1
OG0005003	P	BL17364	g15284.t1	g28580.t1	g26996.t1	g23109.t1	g8455.t1	g17480.t1	g18984.t1	XP_033763137.1
OG0005004	P	BL14060	g14705.t1	g14497.t1	g27009.t1	g23066.t1	g20502.t1	g17374.t1	g18066.t2	XP_033764208.1
OG0005006	Qa	BL26729	g2697.t2	g991.t1	g28236.t1	g7786.t1	g1092.t1	g1179.t1	g1421.t1	XP_033743544.1
OG0005007	D	BL19709	g7377.t1	g27037.t1	g15687.t1	g15273.t1	g4779.t1	g8220.t1	g17829.t1	XP_033754397.1
OG0005009	A1a	BL01864	g10573.t1	g29273.t1	g2882.t1	g7980.t1	g16644.t1	g14904.t1	g4580.t2	XP_033736187.1
OG0005010	H	BL09013	g5623.t1	g969.t1	g12346.t1	g9600.t1	g9828.t1	g7483.t1	g1981.t1	XP_033744562.1
OG0005011	A1b	BL22475	g11781.t1	g20058.t1	g4561.t1	g8914.t1	g15697.t1	g14119.t1	g5710.t1	XP_033735446.1
OG0005012	O1	BL17567	g8010.t1	g3050.t1	g14866.t1	g1976.t1	g3742.t1	g10112.t1	g12608.t1	XP_033751397.1
OG0005013	J2	BL06977	g3350.t1	g22360.t1	g29438.t1	g4571.t1	g789.t1	g1040.t1	g7710.t1	XP_033736779.1
OG0005014	G	BL04018	g5357.t1	g2365.t1	g11921.t1	g2985.t1	g12075.t1	g7155.t1	g2960.t1	XP_033747701.1
OG0005015	N	BL07993	g12648.t1	g9385.t1	g22468.t2	g6302.t1	g25680.t1	g19078.t1	g15551.t2	XP_033759577.1
OG0005016	D	BL19646	g4303.t1	g7755.t1	g10582.t1	g15374.t1	g10294.t1	g6433.t1	g17837.t1	XP_033754953.1
OG0005017	A1a	BL22405	g10905.t1	g17561.t1	g3046.t1	g8451.t1	g16475.t1	g14584.t1	g4895.t1	XP_033735702.1
OG0005018	L	BL06038	g5190.t1	g23331.t1	g10768.t1	g3387.t1	g10692.t1	g6381.t1	g7765.t1	XP_033738812.1
OG0005019	K	BL23558	g14650.t1	g19630.t1	g27184.t1	g3144.t1	g21645.t1	g17652.t1	g9574.t1	XP_033741404.1
OG0005020	N	BL26009	g13522.t2	g9384.t1	g22168.t1	g7384.t1	g25768.t1	g18572.t1	g15406.t1	XP_033759330.1
OG0005022	L	BL03709	g3105.t1	g20687.t2	g29186.t1	g4845.t1	g2932.t1	g703.t1	g7414.t1	XP_033737845.1
OG0005023	F	BL02548	g18644.t1	g25497.t1	g7189.t1	g12555.t1	g12700.t1	g16471.t1	g14710.t1	XP_033743782.1
OG0005024	M	BL18277	g4744.t1	g4156.t1	g11232.t1	g13179.t1	g10341.t1	g6750.t1	g23822.t2	XP_033732111.1
OG0005027	A1a	BL01186	g2467.t1	g26646.t2	g23768.t1	g8924.t1	g2189.t1	g3834.t2	g4582.t1	XP_033734374.1
OG0005028	Qb	BL26735	g3155.t1	g21615.t1	g29111.t1	g7853.t1	g1180.t1	g475.t1	g1361.t1	XP_033737424.1
OG0005029	Eb	BL27338	g6125.t2	g15141.t1	g11746.t2	g18939.t1	g12182.t1	g7607.t1	g11769.t2	XP_033745335.1
OG0005030	K	BL23429	g14550.t2	g18875.t1	g26866.t3	g4475.t1	g20870.t2	g17583.t1	g8054.t1	XP_033740913.1
OG0005031	B2	BL03376	g4907.t1	g4431.t1	g11415.t1	g20765.t2	g11115.t1	g6854.t1	g19336.t3	XP_033733217.1
OG0005032	Eb	BL27553	g3973.t1	g12349.t1	g10190.t1	g18350.t1	g10660.t1	g5845.t1	g12430.t1	XP_033745271.1
OG0005033	K	BL26921	g15015.t1	g19755.t1	g26323.t2	g1594.t1	g21767.t1	g17807.t1	g8896.t1	XP_033740962.1
OG0005034	N	BL13987	g12285.t1	g25558.t1	g23101.t1	g7246.t1	g24245.t1	g19492.t1	g15365.t1	XP_033759838.1
OG0005035	L	BL06418	g2139.t1	g23301.t2	g23840.t1	g2163.t1	g1796.t2	g2044.t2	g6533.t1	XP_033738380.1
OG0005036	Ea	BL17516	g2670.t1	g12526.t1	g28670.t1	g18999.t1	g2493.t1	g1649.t1	g11353.t1	XP_033744654.1
OG0005037	D	BL05010	g6111.t1	g8512.t1	g12493.t1	g14731.t1	g10507.t1	g7592.t1	g17756.t1	XP_033754965.1
OG0005038	A1a	BL01105	g11874.t1	g25945.t1	g3350.t1	g11096.t1	g14781.t1	g13782.t1	g4411.t1	XP_033735848.1
OG0005039	L	BL06199	g613.t1	g1192.t1	g24971.t1	g4884.t1	g2628.t1	g2601.t1	g6376.t2	XP_033736644.1
OG0005040	Ea	BL09319	g5003.t1	g12650.t1	g11255.t1	g17697.t1	g10053.t1	g6739.t1	g12188.t1	XP_033745912.1
OG0005041	A1a	BL01429	g8968.t1	g25190.t1	g19893.t1	g9570.t1	g8349.t1	g4452.t1	g5762.t1	XP_033735930.1
OG0005042	H	BL24896	g4625.t1	g20574.t1	g11063.t1	g10113.t1	g11953.t1	g7887.t1	g99.t1	XP_033736027.1
OG0005043	H	BL24754	g4527.t1	g9806.t1	g10306.t1	g9024.t1	g11317.t1	g6149.t1	g1452.t1	XP_033752503.1
OG0005044	I	BL21980	g5115.t1	g22038.t1	g10425.t1	g3483.t1	g10598.t1	g6639.t1	g9730.t1	XP_033756530.1
OG0005045	J2	BL07241	g2781.t1	g10670.t1	g28428.t1	g5278.t1	g1423.t1	g1105.t1	g6792.t1	XP_033738003.1
OG0005046	K	BL13583	g14518.t1	g13225.t1	g27849.t1	g2440.t1	g21175.t2	g17200.t1	g7999.t1	XP_033741489.1
OG0005047	C2	BL16798	g11111.t3	g16379.t1	g2425.t1	g8776.t1	g16301.t1	g14979.t1	g20753.t2	XP_033725565.1
OG0005048	H	BL02400	g1208.t1	g22529.t1	g25410.t1	g8065.t1	g270.t2	g3232.t1	g1337.t1	XP_033746112.1
OG0005049	L	BL06064	g4832.t1	g9964.t1	g11325.t1	g3271.t2	g9455.t1	g6718.t1	g7872.t2	XP_033738746.1
OG0005050	A1a	BL01601	g11772.t1	g19384.t1	g4178.t1	g9622.t2	g15832.t1	g14299.t1	g5895.t1	XP_033734572.1
OG0005052	B1	BL17308	g3790.t1	g12668.t1	g10049.t1	g17549.t1	g9737.t1	g5976.t1	g22305.t3	XP_033762672.1
OG0005053	N	BL26672	g12672.t1	g25098.t1	g21446.t1	g6356.t1	g24954.t1	g19285.t1	g15318.t1	XP_033759893.1
OG0005054	Eb	BL28004	g6496.t1	g12698.t1	g14464.t1	g19457.t1	g5475.t1	g11083.t1	g11536.t1	XP_033744963.1
OG0005055	A1a	BL01981	g11319.t1	g29744.t1	g4324.t1	g8040.t1	g14486.t1	g13998.t1	g5470.t1	XP_033734883.1
OG0005056	F	BL02917	g18931.t1	g9124.t1	g7239.t1	g12937.t1	g12608.t4	g16703.t1	g14715.t1	XP_033743006.1
OG0005057	M	BL18262	g12102.t2	g22248.t1	g3549.t4	g12640.t3	g14898.t3	g14611.t1	g23834.t2	XP_033731299.1
OG0005058	A1a	BL01829	g11562.t1	g25923.t1	g3459.t1	g9612.t2	g15291.t1	g13815.t1	g5576.t1	XP_033735638.1
OG0005059	C2	BL15768	g16550.t1	g28956.t1	g5424.t1	g9278.t1	g19875.t1	g12076.t2	g20783.t1	XP_033725059.1
OG0005060	Ea	BL09262	g4194.t1	g4689.t1	g9504.t1	g18214.t2	g19408.t1	g5501.t1	g11176.t1	XP_033746095.1
OG0005061	M	BL18300	g20220.t1	g3981.t1	g14149.t1	g12582.t1	g17307.t1	g12504.t1	g24168.t1	XP_033725008.1
OG0005062	A1a	BL14742	g12003.t1	g19418.t1	g3576.t1	g9214.t1	g16304.t1	g14812.t1	g4861.t1	XP_033735557.1
OG0005063	L	BL03679	g971.t1	g2146.t1	g24171.t1	g217.t1	g239.t1	g1740.t1	g7357.t1	XP_033736756.1
OG0005064	M	BL26867	g11909.t1	g4149.t1	g3768.t1	g13111.t1	g16148.t2	g14686.t2	g23738.t1	XP_033732381.1
OG0005065	G	BL04024	g10170.t1	g27517.t1	g20845.t1	g596.t1	g8165.t1	g4254.t1	g4068.t1	XP_033747411.1
OG0005066	B2	BL11148	g9353.t1	g12482.t2	g20468.t1	g20828.t1	g8097.t1	g3986.t1	g19138.t2	XP_033732076.1
OG0005067	J1	BL17802	g8669.t1	g21471.t1	g19400.t1	g21737.t1	g8632.t1	g5315.t1	g25629.t1	XP_033726591.1
OG0005068	L	BL03697	g9431.t1	g3869.t1	g19769.t1	g5217.t1	g8237.t1	g4772.t1	g7122.t1	XP_033737958.1
OG0005069	B1	BL04411	g5407.t1	g8181.t1	g11874.t1	g16778.t1	g12459.t1	g7165.t1	g22304.t1	XP_033762041.1
OG0005070	D	BL05479	g4138.t1	g26976.t1	g9786.t1	g15512.t1	g10641.t1	g5706.t1	g17150.t1	XP_033754269.1
OG0005071	A1b	BL00961	g11550.t1	g29274.t1	g3445.t1	g8416.t1	g15281.t1	g13796.t1	g4695.t1	XP_033734471.1
OG0005072	H	BL24907	g6679.t1	g21896.t1	g16199.t1	g10720.t1	g5911.t1	g8354.t1	g1774.t1	XP_033751404.1
OG0005073	G	BL20501	g10837.t1	g8104.t1	g2568.t1	g4698.t1	g14665.t1	g14845.t1	g4250.t1	XP_033747674.1
OG0005074	H	BL19260	g1199.t1	g21559.t1	g25404.t1	g9107.t1	g264.t1	g3237.t1	g1629.t1	XP_033746809.1
OG0005075	I	BL06720	g6786.t1	g2305.t1	g14389.t1	g5651.t3	g5116.t1	g11143.t1	g9822.t3	XP_033757488.1
OG0005076	I	BL08123	g7849.t1	g9896.t1	g16659.t1	g552.t1	g6234.t1	g8837.t1	g11133.t1	XP_033756740.1
OG0005077	H	BL24812	g4095.t1	g9985.t1	g9726.t1	g9923.t1	g12017.t1	g5685.t1	g460.t1	XP_033755626.1
OG0005078	A1a	BL01393	g11655.t1	g29580.t1	g3926.t1	g11199.t1	g16122.t1	g14499.t1	g6080.t1	XP_033735716.1
OG0005079	A1a	BL22398	g11762.t1	g19304.t2	g3366.t1	g9855.t1	g14918.t1	g13788.t1	g4828.t1	XP_033735416.1
OG0005080	Eb	BL27555	g3427.t1	g18783.t2	g29369.t1	g18248.t1	g2379.t1	g855.t2	g11545.t1	XP_033744590.1
OG0005083	C1	BL25132	g2802.t1	g18581.t1	g28397.t1	g2167.t1	g971.t1	g1126.t1	g4103.t1	XP_033749123.1
OG0005084	M	BL18083	g19843.t1	g22289.t2	g12805.t1	g13100.t1	g17968.t2	g13608.t1	g23880.t1	XP_033732294.1
OG0005085	B1	BL08299	g4087.t1	g8140.t1	g9731.t1	g16927.t2	g11076.t1	g5690.t4	g22930.t1	XP_033761641.1
OG0005086	R	BL15755	g1884.t1	g23247.t1	g28626.t1	g2193.t1	g1089.t1	g997.t1	g12943.t1	XP_033751673.1
OG0005087	K	BL13502	g17090.t1	g28540.t1	g18852.t1	g5540.t1	g22331.t1	g21332.t1	g8019.t1	XP_033740241.1
OG0005088	F	BL03022	g19104.t2	g25079.t1	g8602.t1	g12428.t1	g13099.t1	g15700.t1	g15011.t1	XP_033743741.1
OG0005089	Ea	BL27887	g4631.t1	g13651.t1	g11088.t1	g19042.t1	g11980.t1	g7882.t1	g11760.t1	XP_033744745.1
OG0005090	B2	BL11284	g7368.t1	g5704.t1	g15679.t1	g21001.t1	g4106.t1	g8226.t1	g19344.t1	XP_033732045.1
OG0005091	A1a	BL01790	g11224.t1	g19195.t1	g2431.t1	g10512.t1	g16561.t2	g15001.t1	g6143.t1	XP_033734496.1
OG0005092	N	BL26006	g12699.t1	g9254.t1	g22039.t1	g7180.t1	g24833.t1	g19165.t1	g15744.t1	XP_033760193.1
OG0005093	I	BL21877	g3005.t1	g3812.t1	g29279.t1	g4179.t3	g1747.t1	g774.t1	g10879.t1	XP_033757428.1
OG0005094	G	BL10013	g5654.t1	g27071.t1	g12377.t1	g1927.t1	g11022.t1	g7501.t1	g2507.t1	XP_033748615.1
OG0005095	P	BL14014	g13913.t1	g14286.t1	g27555.t1	g22928.t1	g20357.t1	g17698.t1	g18394.t1	XP_033764371.1
OG0005096	A2	BL01685	g6580.t1	g12332.t1	g14456.t1	g19613.t1	g5514.t1	g11234.t1	g25098.t1	XP_033758974.1
OG0005097	I	BL21375	g3222.t1	g1564.t1	g28738.t1	g1857.t1	g2839.t1	g329.t1	g10680.t1	XP_033756376.1
OG0005098	I	BL21436	g6406.t1	g23039.t1	g14683.t1	g4154.t1	g4704.t2	g10875.t1	g10959.t1	XP_033757706.1
OG0005099	A1a	BL01362	g11993.t1	g17821.t1	g3281.t1	g10491.t1	g15296.t2	g14230.t1	g4444.t1	XP_033734695.1
OG0005100	L	BL06319	g3305.t1	g10465.t1	g29331.t1	g2164.t1	g1158.t1	g819.t1	g6532.t1	XP_033738378.1
OG0005101	P	BL21151	g15130.t1	g28592.t1	g26845.t1	g23969.t1	g20187.t1	g17484.t1	g18895.t1	XP_033764024.1
OG0005102	J2	BL03410	g6908.t1	g21183.t1	g14501.t1	g261.t1	g5016.t1	g11050.t1	g6784.t1	XP_033738559.1
OG0005103	B1	BL04430	g6848.t1	g27407.t1	g15879.t1	g17171.t1	g4533.t1	g8967.t1	g22672.t1	XP_033761340.1
OG0005104	H	BL19032	g14640.t1	g14283.t1	g27134.t1	g17091.t1	g21346.t1	g18103.t1	g1617.t1	XP_033738376.1
OG0005105	G	BL19992	g889.t1	g8645.t1	g25479.t1	g382.t1	g1101.t1	g3175.t1	g3560.t1	XP_033748766.1
OG0005106	Qa	BL15142	g7446.t1	g908.t1	g15775.t1	g7701.t3	g4331.t1	g8290.t1	g1126.t3	XP_033747681.1
OG0005107	K	BL23358	g17258.t1	g14626.t1	g18647.t1	g4530.t1	g23646.t1	g20927.t1	g9666.t1	XP_033741784.1
OG0005108	H	BL19341	g7757.t1	g2049.t1	g17089.t1	g9209.t1	g3939.t1	g8022.t1	g462.t1	XP_033736835.1
OG0005109	B1	BL04368	g8996.t1	g12329.t1	g20339.t1	g16197.t1	g8101.t1	g3955.t1	g22678.t1	XP_033761941.1
OG0005110	B1	BL04234	g1278.t1	g18579.t1	g24540.t1	g17363.t1	g2362.t1	g2311.t1	g22241.t1	XP_033761300.1
OG0005111	C1	BL07212	g162.t2	g14008.t1	g25761.t1	g5142.t1	g844.t1	g3004.t1	g3520.t1	XP_033751117.1
OG0005112	O2	BL18626	g14294.t1	g14516.t1	g27393.t1	g2389.t1	g20262.t1	g18461.t1	g8405.t1	XP_033740260.1
OG0005113	P	BL14603	g14290.t1	g18054.t1	g27388.t1	g22949.t2	g21056.t1	g18457.t1	g18434.t1	XP_033724768.1
OG0005114	Ea	BL27419	g3869.t1	g15324.t1	g9846.t1	g19165.t1	g10917.t1	g5766.t1	g12350.t1	XP_033744593.1
OG0005115	P	BL04812	g14831.t1	g14302.t1	g26901.t1	g22709.t1	g21406.t1	g17614.t1	g18301.t1	XP_033763190.1
OG0005116	A1a	BL25565	g16448.t1	g19539.t1	g6209.t1	g7612.t1	g18426.t1	g11742.t1	g4731.t1	XP_033734274.1
OG0005117	B2	BL10646	g878.t1	g6983.t1	g24776.t2	g21002.t1	g352.t1	g2734.t1	g19483.t1	XP_033733360.1
OG0005118	L	BL06144	g5189.t1	g2541.t1	g10769.t1	g3492.t1	g10693.t1	g6382.t1	g7623.t1	XP_033738825.1
OG0005119	I	BL21726	g2547.t1	g1563.t1	g23883.t1	g3165.t3	g204.t1	g1795.t1	g11167.t1	XP_033756467.1
OG0005120	A2	BL01943	g42.t1	g10974.t1	g26123.t1	g19837.t1	g2121.t1	g2864.t1	g24786.t1	XP_033759049.1
OG0005121	B3	BL26614	g252.t1	g7490.t1	g25616.t1	g9957.t1	g402.t1	g3070.t2	g22050.t2	XP_033727919.1
OG0005122	B1	BL17322	g784.t1	g7562.t1	g25451.t1	g17537.t2	g2650.t2	g3193.t1	g22510.t1	XP_033761271.1
OG0005123	N	BL26644	g12826.t1	g17084.t1	g23549.t1	g6015.t3	g24435.t1	g20160.t2	g15562.t1	XP_033759920.1
OG0005124	A1a	BL01547	g11342.t1	g19273.t1	g4334.t1	g9443.t1	g16190.t1	g14068.t1	g4852.t1	XP_033734966.1
OG0005125	C1	BL07609	g2800.t1	g16392.t2	g28400.t4	g2168.t3	g969.t1	g1124.t1	g3405.t7	XP_033750939.1
OG0005126	Ea	BL27717	g5266.t1	g26701.t1	g10930.t1	g18118.t2	g9494.t1	g6511.t1	g12415.t3	XP_033746090.1
OG0005127	G	BL20058	g894.t1	g27480.t1	g25482.t1	g2984.t1	g3594.t1	g3172.t1	g3944.t1	XP_033747977.1
OG0005128	C1	BL07434	g4610.t1	g18798.t1	g11056.t2	g2045.t1	g11966.t1	g7904.t1	g3438.t2	XP_033750784.1
OG0005129	B1	BL17029	g14009.t1	g14033.t1	g28163.t1	g17558.t5	g20465.t1	g17121.t1	g22732.t1	XP_033762799.1
OG0005130	Ea	BL09261	g5437.t1	g4692.t1	g12050.t1	g18858.t1	g10519.t1	g7393.t1	g11337.t2	XP_033746058.1
OG0005131	H	BL24840	g8248.t1	g884.t1	g16588.t1	g10088.t1	g5685.t1	g8979.t1	g440.t1	XP_033755361.1
OG0005132	B1	BL04225	g2252.t1	g15335.t1	g23858.t1	g16678.t1	g668.t1	g1576.t1	g22319.t1	XP_033762060.1
OG0005133	K	BL20874	g17322.t1	g28240.t1	g18821.t1	g5848.t1	g23278.t1	g21244.t1	g9294.t1	XP_033741438.1
OG0005134	H	BL24743	g1459.t2	g9539.t1	g23985.t1	g10165.t2	g179.t1	g1765.t1	g1620.t1	XP_033747071.1
OG0005135	M	BL18369	g14548.t1	g22677.t1	g26869.t1	g11984.t1	g20872.t1	g17585.t1	g24237.t1	XP_033732118.1
OG0005136	K	BL23567	g15297.t1	g27765.t1	g26977.t1	g2940.t1	g19911.t1	g17361.t1	g8267.t1	XP_033740459.1
OG0005137	A1b	BL25558	g16556.t1	g25693.t1	g5430.t1	g8892.t1	g19888.t1	g12067.t2	g6023.t1	XP_033736165.1
OG0005138	Qa	BL14900	g449.t3	g9790.t1	g25711.t2	g8003.t1	g1963.t1	g3129.t1	g1171.t1	XP_033752636.1
OG0005139	Qa	BL14807	g16825.t1	g11022.t1	g17846.t1	g11042.t1	g22763.t1	g20371.t1	g332.t1	XP_033732437.1
OG0005140	D	BL05078	g3281.t1	g16114.t2	g29354.t1	g15423.t1	g2719.t2	g842.t1	g17822.t1	XP_033755593.1
OG0005141	B1	BL04283	g9297.t1	g5171.t1	g20727.t1	g16071.t1	g8736.t1	g3651.t2	g22285.t1	XP_033761273.1
OG0005142	D	BL05409	g4874.t1	g5503.t1	g11364.t1	g14260.t1	g12215.t1	g6886.t1	g17775.t1	XP_033755196.1
OG0005143	G	BL24275	g6956.t1	g12941.t1	g16377.t1	g736.t1	g6356.t1	g8712.t1	g2163.t2	XP_033749046.1
OG0005144	Eb	BL23901	g2786.t2	g7188.t1	g28419.t1	g19108.t1	g768.t1	g1112.t1	g11488.t1	XP_033744903.1
OG0005145	B1	BL17266	g4499.t1	g8751.t1	g10364.t1	g15957.t1	g12094.t1	g6138.t1	g22300.t1	XP_033763031.1
OG0005146	A1a	BL01618	g16440.t1	g26578.t1	g6248.t1	g10956.t1	g18430.t1	g15485.t1	g5498.t1	XP_033734925.1
OG0005147	A1a	BL14697	g16046.t1	g25926.t1	g6565.t1	g9719.t1	g18647.t1	g11409.t1	g5486.t1	XP_033735451.1
OG0005148	K	BL13589	g17253.t1	g11992.t1	g18643.t1	g18226.t1	g23777.t1	g20767.t1	g8029.t2	XP_033740931.1
OG0005149	P	BL14593	g17875.t1	g28028.t1	g17766.t1	g23222.t1	g22750.t1	g20413.t2	g18921.t1	XP_033764379.1
OG0005150	C1	BL07183	g6703.t1	g8894.t1	g14491.t1	g2648.t1	g5141.t1	g11058.t1	g3511.t2	XP_033750837.1
OG0005151	K	BL20959	g15974.t1	g13378.t1	g18559.t1	g5531.t1	g23832.t1	g20929.t1	g8654.t1	XP_033740541.1
OG0005152	F	BL02679	g13374.t1	g25078.t1	g22362.t1	g13162.t1	g24198.t1	g18662.t1	g14505.t2	XP_033743804.1
OG0005153	K	BL23336	g14236.t1	g11762.t2	g27329.t3	g2292.t4	g21836.t1	g18451.t1	g9100.t2	XP_033741002.1
OG0005154	N	BL10810	g13527.t1	g8276.t1	g22173.t1	g6639.t1	g24681.t2	g18578.t1	g2191.t1	XP_033759958.1
OG0005155	B1	BL12644	g3001.t1	g4990.t1	g29282.t1	g16083.t1	g2444.t1	g777.t1	g23051.t1	XP_033761888.1
OG0005156	Ea	BL27713	g7303.t1	g14692.t1	g15621.t1	g18119.t1	g5766.t1	g8472.t1	g12221.t1	XP_033746092.1
OG0005157	D	BL04945	g3846.t1	g7782.t1	g9589.t1	g15378.t1	g10634.t1	g5565.t1	g17198.t1	XP_033754439.1
OG0005158	Ea	BL27943	g304.t1	g6509.t1	g26001.t1	g17905.t1	g2061.t1	g2941.t1	g12412.t1	XP_033744842.1
OG0005159	I	BL21873	g6648.t1	g3335.t1	g16070.t1	g5635.t1	g4594.t1	g8614.t1	g9906.t1	XP_033756307.1
OG0005160	L	BL24393	g15121.t1	g2600.t2	g26394.t1	g3399.t1	g21220.t1	g17742.t1	g7899.t1	XP_033737847.1
OG0005161	C1	BL07120	g4947.t1	g6056.t1	g10431.t1	g5068.t1	g9679.t2	g6642.t1	g1753.t1	XP_033750171.1
OG0005162	J1	BL08552	g2609.t1	g3946.t1	g29562.t1	g21872.t2	g1858.t1	g1398.t1	g25290.t1	XP_033726997.1
OG0005163	B3	BL12339	g1075.t1	g7741.t1	g25089.t1	g9956.t1	g1530.t1	g2488.t1	g21942.t1	XP_033729078.1
OG0005164	H	BL19406	g3013.t1	g22233.t1	g29271.t1	g9042.t1	g3597.t1	g765.t1	g878.t1	XP_033751627.1
OG0005165	J2	BL06935	g9426.t1	g103.t1	g19773.t1	g2321.t1	g8227.t2	g4831.t1	g7666.t1	XP_033737718.1
OG0005166	H	BL19229	g3423.t1	g9481.t1	g29372.t1	g8066.t1	g2373.t2	g858.t1	g1175.t1	XP_033746091.1
OG0005167	N	BL16656	g12851.t1	g8278.t1	g23580.t2	g6792.t1	g24509.t1	g20182.t1	g15350.t1	XP_033759734.1
OG0005169	M	BL18361	g3542.t1	g651.t2	g28505.t1	g11649.t1	g1406.t1	g893.t1	g24252.t1	XP_033729525.1
OG0005170	H	BL19269	g6962.t1	g9650.t1	g16344.t1	g8105.t1	g6024.t1	g8544.t1	g483.t2	XP_033748253.1
OG0005171	Ea	BL27800	g2028.t2	g12372.t1	g29730.t1	g18017.t1	g1399.t1	g1546.t1	g12407.t1	XP_033730696.1
OG0005172	N	BL10797	g13105.t1	g24910.t2	g21778.t1	g5992.t3	g25698.t1	g18954.t1	g15912.t1	XP_033760046.1
OG0005173	Ea	BL10959	g5934.t1	g13541.t1	g12278.t1	g18014.t1	g10942.t1	g7709.t1	g12463.t1	XP_033744661.1
OG0005174	K	BL23570	g14367.t1	g27017.t1	g27105.t1	g4769.t1	g21272.t1	g18117.t1	g8066.t1	XP_033741296.1
OG0005175	L	BL06148	g2698.t1	g3041.t1	g28237.t1	g3571.t1	g358.t1	g1180.t1	g6867.t1	XP_033737671.1
OG0005176	D	BL05467	g6208.t1	g13727.t1	g12473.t1	g14721.t1	g9936.t1	g7574.t1	g16588.t1	XP_033754334.1
OG0005177	K	BL06563	g14851.t1	g28063.t1	g26819.t1	g1950.t1	g21696.t1	g17861.t1	g9579.t1	XP_033741020.1
OG0005179	A1a	BL01343	g11687.t1	g26699.t1	g3751.t1	g9619.t1	g15730.t1	g14664.t1	g5867.t1	XP_033734573.1
OG0005180	A1a	BL01359	g16668.t1	g19467.t1	g5011.t1	g9801.t1	g19449.t1	g12358.t1	g5668.t1	XP_033734571.1
OG0005181	I	BL21471	g7339.t1	g3665.t1	g15560.t1	g4932.t1	g4357.t1	g8253.t1	g10953.t1	XP_033756607.1
OG0005182	D	BL05250	g8239.t1	g14318.t1	g16597.t1	g14478.t1	g4489.t1	g8971.t1	g17728.t1	XP_033755767.1
OG0005183	I	BL21476	g4997.t1	g21700.t1	g11261.t1	g2773.t1	g10046.t1	g6737.t1	g9877.t1	XP_033757767.1
OG0005184	P	BL14361	g17648.t1	g14287.t1	g18859.t1	g22929.t1	g23774.t2	g21326.t1	g18584.t1	XP_033764370.1
OG0005185	H	BL19236	g3794.t1	g9785.t1	g10045.t1	g7842.t1	g9733.t1	g5980.t1	g1280.t1	XP_033749004.1
OG0005186	Eb	BL27438	g3499.t1	g15325.t1	g28861.t1	g17749.t1	g2458.t1	g688.t1	g12483.t1	XP_033744610.1
OG0005187	G	BL24238	g5839.t1	g13551.t1	g12188.t1	g3125.t1	g11536.t1	g7798.t2	g2352.t1	XP_033747793.1
OG0005188	B1	BL17073	g2559.t1	g18558.t1	g29623.t1	g16026.t1	g3422.t1	g1442.t1	g22459.t1	XP_033762886.1
OG0005189	P	BL14260	g17742.t1	g18089.t1	g18489.t2	g22874.t1	g22221.t3	g20961.t1	g18857.t1	XP_033763561.1
OG0005190	F	BL02893	g19161.t1	g9457.t1	g7598.t2	g13020.t1	g13269.t1	g16797.t1	g14714.t1	XP_033742690.1
OG0005191	L	BL03678	g1108.t1	g143.t1	g25061.t1	g960.t1	g3068.t1	g2520.t1	g7891.t1	XP_033737369.1
OG0005192	D	BL05165	g8296.t1	g7442.t1	g14941.t1	g14348.t1	g5366.t1	g10193.t1	g17636.t1	XP_033755023.1
OG0005193	M	BL22703	g19900.t1	g22806.t1	g12786.t1	g11599.t1	g17215.t2	g13494.t1	g24324.t1	XP_033732703.1
OG0005194	F	BL24537	g12610.t1	g24488.t1	g22127.t1	g12605.t3	g23979.t1	g19111.t1	g15159.t1	XP_033742349.1
OG0005195	N	BL25947	g12378.t1	g25300.t1	g23432.t1	g6928.t1	g24984.t1	g20115.t1	g16408.t1	XP_033760179.1
OG0005196	B2	BL10622	g8273.t1	g5604.t1	g16873.t1	g19676.t2	g5813.t1	g9740.t1	g19272.t2	XP_033724666.1
OG0005197	A2	BL14686	g596.t1	g21053.t1	g24990.t1	g20747.t1	g1735.t1	g2590.t1	g16637.t1	XP_033758594.1
OG0005198	A1a	BL01689	g16640.t1	g26119.t1	g6121.t1	g10960.t1	g19300.t1	g11801.t1	g5478.t1	XP_033734439.1
OG0005199	A1a	BL01748	g16465.t1	g19340.t1	g5202.t2	g10444.t1	g19212.t1	g12250.t1	g6186.t1	XP_033735460.1
OG0005200	J2	BL07036	g2263.t1	g21782.t1	g23881.t1	g3814.t1	g3532.t1	g1586.t1	g2174.t1	XP_033737353.1
OG0005201	O1	BL16468	g1880.t2	g21978.t1	g28622.t1	g2028.t1	g2142.t1	g993.t1	g12773.t1	XP_033751970.1
OG0005202	G	BL20499	g9403.t1	g4226.t1	g20567.t1	g3381.t1	g8712.t1	g4030.t1	g2149.t1	XP_033748627.1
OG0005203	B1	BL04233	g6034.t1	g6831.t1	g12112.t1	g17365.t1	g10661.t1	g7294.t1	g22423.t1	XP_033761467.1
OG0005204	A2	BL00834	g2400.t1	g23179.t1	g23913.t1	g20895.t1	g1851.t1	g1804.t1	g24603.t1	XP_033758841.1
OG0005205	B2	BL11396	g5401.t1	g8478.t1	g11882.t1	g20086.t1	g12138.t1	g7171.t1	g19529.t1	XP_033733235.1
OG0005206	F	BL03175	g12934.t1	g25144.t1	g23326.t1	g13013.t1	g24785.t1	g19873.t1	g13877.t1	XP_033743724.1
OG0005208	A2	BL00837	g2401.t2	g4370.t1	g23914.t1	g20903.t1	g1866.t1	g1803.t1	g24889.t1	XP_033757950.1
OG0005209	C2	BL15804	g7352.t1	g7493.t1	g15659.t2	g9838.t1	g4121.t1	g8241.t1	g20124.t1	XP_033724907.1
OG0005210	I	BL09666	g3133.t1	g2563.t1	g29153.t1	g3344.t1	g1323.t1	g456.t1	g10785.t1	XP_033756099.1
OG0005211	L	BL12143	g7079.t1	g2984.t1	g16407.t1	g4921.t1	g3906.t2	g9017.t1	g6449.t1	XP_033738731.1
OG0005212	B2	BL11055	g4762.t1	g7655.t1	g11203.t1	g19486.t1	g11645.t1	g6767.t1	g19478.t1	XP_033732888.1
OG0005213	O1	BL04530	g74.t1	g22374.t1	g26014.t1	g1837.t1	g2717.t1	g2950.t1	g12829.t1	XP_033752456.1
OG0005214	P	BL04721	g18065.t1	g14786.t1	g18086.t1	g23141.t4	g23750.t1	g20524.t1	g19027.t5	XP_033763597.1
OG0005215	I	BL21767	g8017.t1	g2140.t1	g14834.t1	g5917.t1	g5371.t1	g10119.t1	g9947.t1	XP_033757703.1
OG0005216	D	BL10279	g4257.t2	g13532.t1	g9907.t1	g15797.t1	g12337.t1	g5895.t1	g16573.t1	XP_033755430.1
OG0005217	J2	BL06923	g2371.t2	g10853.t1	g29945.t1	g901.t1	g604.t2	g1632.t1	g7790.t1	XP_033737318.1
OG0005218	A1a	BL01513	g11899.t2	g26240.t1	g3276.t1	g11098.t1	g15302.t1	g14234.t1	g4380.t1	XP_033735510.1
OG0005219	A2	BL00640	g1680.t1	g1344.t1	g25306.t1	g15688.t1	g2854.t1	g3301.t1	g25211.t1	XP_033758985.1
OG0005220	N	BL25744	g12670.t1	g20390.t1	g21448.t1	g7405.t1	g25013.t1	g19291.t1	g16348.t1	XP_033760048.1
OG0005221	I	BL08119	g1101.t1	g10645.t1	g25068.t1	g4356.t1	g977.t1	g2511.t1	g9803.t1	XP_033757172.1
OG0005222	H	BL19593	g942.t2	g21957.t1	g24214.t1	g7961.t1	g2542.t1	g2141.t1	g1166.t1	XP_033751639.1
OG0005223	F	BL02818	g13359.t3	g8275.t1	g22573.t1	g11342.t1	g24185.t1	g19629.t1	g14785.t1	XP_033744215.1
OG0005224	B1	BL04399	g8180.t1	g27406.t1	g16454.t1	g17172.t1	g3658.t1	g8423.t1	g22666.t1	XP_033762919.1
OG0005225	K	BL23479	g13949.t1	g11856.t1	g28084.t1	g4692.t1	g20909.t1	g17001.t1	g8339.t2	XP_033741103.1
OG0005226	P	BL08933	g17036.t1	g12957.t1	g17271.t1	g23384.t1	g22363.t1	g20644.t1	g18068.t1	XP_033763139.1
OG0005227	C1	BL07897	g9211.t2	g27299.t1	g19162.t1	g1653.t2	g9321.t1	g5154.t1	g2508.t1	XP_033749761.1
OG0005228	C1	BL07927	g8684.t1	g27533.t1	g19397.t1	g609.t1	g8635.t1	g5314.t1	g2162.t1	XP_033727260.1
OG0005229	Qa	BL14927	g15311.t1	g2797.t1	g26622.t1	g7889.t1	g20311.t1	g17891.t1	g1368.t2	XP_033735583.1
OG0005230	D	BL05193	g516.t1	g7409.t1	g24822.t1	g14456.t1	g3039.t1	g2718.t1	g16663.t1	XP_033754861.1
OG0005231	Eb	BL28005	g5910.t1	g5178.t1	g11812.t1	g19104.t1	g10539.t1	g7076.t1	g12340.t1	XP_033744960.1
OG0005232	M	BL21241	g2536.t1	g10986.t1	g23897.t1	g12489.t1	g700.t1	g1745.t2	g24138.t1	XP_033732322.1
OG0005233	Ea	BL27883	g5670.t1	g7418.t1	g12393.t1	g18155.t1	g9786.t1	g7516.t1	g11294.t1	XP_033746594.1
OG0005234	A1a	BL01210	g11736.t1	g17644.t1	g4732.t1	g10542.t1	g16046.t2	g14331.t1	g5835.t1	XP_033735834.1
OG0005235	H	BL19206	g7052.t1	g23307.t1	g16221.t1	g11112.t1	g6541.t1	g8375.t1	g1244.t2	XP_033752590.1
OG0005236	J1	BL08546	g2377.t1	g3951.t2	g29936.t1	g21868.t1	g611.t3	g1626.t1	g25978.t1	XP_033727338.1
OG0005237	I	BL21495	g1792.t1	g501.t1	g28821.t1	g4410.t1	g589.t1	g431.t1	g10765.t2	XP_033756591.1
OG0005238	G	BL04104	g5134.t1	g7573.t1	g10349.t1	g4734.t1	g11684.t1	g6132.t1	g2054.t2	XP_033748042.1
OG0005239	D	BL05149	g5534.t1	g8063.t1	g11985.t1	g14939.t1	g12366.t1	g7649.t1	g17630.t1	XP_033754272.1
OG0005240	F	BL02739	g13606.t1	g24403.t1	g22711.t1	g11564.t1	g25396.t1	g19388.t1	g15143.t1	XP_033743341.1
OG0005241	I	BL09599	g5211.t1	g23330.t1	g10713.t1	g4424.t1	g10441.t1	g6413.t1	g11019.t1	XP_033756903.1
OG0005242	N	BL26016	g19163.t1	g24095.t1	g7600.t1	g7380.t1	g13917.t1	g16799.t1	g15547.t1	XP_033761245.1
OG0005243	D	BL05520	g9343.t1	g12756.t1	g20461.t1	g14566.t1	g6709.t1	g3992.t1	g17883.t2	XP_033754136.1
OG0005244	D	BL19637	g3632.t2	g6989.t1	g28266.t1	g15040.t1	g626.t1	g1203.t1	g17813.t2	XP_033755887.1
OG0005245	B2	BL11025	g8268.t1	g6993.t1	g16868.t1	g20965.t1	g5806.t1	g9726.t1	g19552.t1	XP_033725675.1
OG0005246	C1	BL07311	g7723.t1	g27139.t1	g16763.t1	g3620.t1	g6074.t1	g9106.t1	g2836.t1	XP_033749162.1
OG0005248	D	BL05380	g5270.t2	g18762.t1	g10920.t1	g14339.t3	g9490.t1	g6452.t1	g17278.t2	XP_033755608.1
OG0005249	B2	BL11320	g3505.t1	g12634.t1	g28854.t1	g21033.t1	g2452.t1	g401.t1	g19110.t1	XP_033733124.1
OG0005250	F	BL03010	g13709.t2	g17122.t1	g8274.t1	g12113.t1	g12491.t1	g16292.t1	g15129.t1	XP_033742459.1
OG0005251	D	BL05020	g9654.t1	g13914.t1	g20735.t1	g15813.t1	g8187.t1	g3650.t1	g16718.t2	XP_033755192.1
OG0005252	Qa	BL14880	g462.t1	g20936.t1	g25799.t2	g10132.t1	g1619.t1	g2904.t1	g1649.t1	XP_033747705.1
OG0005253	Ea	BL27820	g4989.t1	g27454.t1	g11285.t1	g17805.t2	g10254.t2	g6733.t1	g12337.t1	XP_033746829.1
OG0005254	G	BL03920	g9843.t1	g13893.t1	g20233.t1	g5023.t2	g9007.t1	g4343.t1	g4020.t1	XP_033748301.1
OG0005255	J2	BL07657	g4618.t1	g21376.t1	g11082.t2	g4344.t2	g11959.t1	g7892.t1	g7773.t1	XP_033736808.1
OG0005256	I	BL21906	g1360.t1	g21806.t1	g24514.t1	g2824.t1	g2766.t1	g2112.t1	g10752.t1	XP_033756057.1
OG0005257	J2	BL07667	g10650.t1	g17958.t1	g3122.t1	g5811.t1	g14716.t2	g14529.t1	g6664.t1	XP_033737289.1
OG0005258	J1	BL03853	g1248.t1	g847.t1	g24616.t1	g22330.t3	g3333.t1	g2388.t1	g26071.t1	XP_033727650.1
OG0005259	H	BL24809	g2710.t1	g22282.t1	g28250.t1	g8714.t1	g367.t2	g1191.t1	g1542.t1	XP_033743131.1
OG0005260	M	BL18435	g14297.t1	g23721.t1	g27397.t1	g11941.t1	g21267.t1	g18473.t1	g23984.t1	XP_033731980.1
OG0005261	F	BL03042	g12072.t1	g9127.t1	g3317.t1	g11871.t2	g16233.t1	g14212.t1	g13809.t1	XP_033742307.1
OG0005262	I	BL21437	g1435.t1	g3668.t1	g25353.t1	g4155.t1	g3197.t2	g3276.t1	g10956.t1	XP_033756915.1
OG0005263	I	BL21959	g9837.t1	g10374.t1	g20229.t1	g945.t2	g7460.t1	g4349.t1	g11166.t1	XP_033757530.1
OG0005264	K	BL08829	g14894.t4	g18228.t1	g26346.t5	g3306.t1	g21184.t4	g17778.t1	g8684.t1	XP_033741247.1
OG0005265	Ea	BL28080	g2803.t1	g12900.t1	g28396.t2	g7347.t1	g652.t1	g1127.t1	g11225.t1	XP_033746540.1
OG0005266	A1a	BL01611	g1544.t2	g10540.t1	g24062.t1	g8620.t1	g1367.t1	g2120.t1	g6168.t1	XP_033733972.1
OG0005267	A1a	BL01360	g15545.t1	g17783.t1	g7575.t1	g8297.t1	g18447.t1	g19658.t1	g4920.t3	XP_033736025.1
OG0005268	B3	BL02037	g4052.t1	g6219.t1	g10227.t1	g10192.t1	g11279.t1	g6090.t1	g22105.t1	XP_033728302.1
OG0005269	J2	BL07074	g7336.t1	g10256.t1	g15563.t1	g1384.t1	g4354.t1	g8256.t1	g6330.t1	XP_033738396.1
OG0005271	F	BL03008	g13236.t1	g17035.t1	g22433.t1	g13089.t1	g25291.t1	g19339.t1	g14065.t1	XP_033743343.1
OG0005272	H	BL09029	g5334.t1	g2927.t1	g11029.t1	g8562.t1	g9703.t1	g6661.t1	g1799.t1	XP_033735963.1
OG0005273	K	BL23507	g14945.t1	g11963.t1	g26473.t1	g2968.t1	g21063.t1	g18342.t1	g8511.t1	XP_033739538.1
OG0005274	D	BL05066	g12375.t1	g15785.t1	g23435.t1	g15442.t1	g25270.t1	g20110.t1	g17413.t1	XP_033754037.1
OG0005276	M	BL18042	g20428.t1	g4210.t1	g14019.t1	g11562.t1	g17373.t1	g12568.t1	g24084.t2	XP_033725234.1
OG0005277	D	BL12467	g1590.t1	g7406.t1	g14746.t1	g15271.t1	g459.t1	g10899.t1	g16676.t1	XP_033755892.1
OG0005278	G	BL20404	g8640.t1	g19174.t1	g19484.t1	g3260.t1	g6716.t1	g5053.t1	g2263.t1	XP_033747259.1
OG0005279	A1a	BL01263	g15104.t2	g29844.t1	g26451.t1	g11168.t1	g20781.t1	g18354.t1	g4515.t1	XP_033735565.1
OG0005280	C1	BL07875	g3503.t1	g3038.t1	g28858.t1	g3943.t1	g2455.t1	g691.t1	g2599.t1	XP_033750394.1
OG0005281	G	BL19886	g2644.t2	g18811.t1	g29304.t3	g5232.t1	g1766.t1	g801.t1	g2820.t2	XP_033747818.1
OG0005282	B3	BL18992	g3715.t1	g4942.t1	g9614.t1	g10982.t2	g9850.t1	g5585.t1	g22128.t1	XP_033728067.1
OG0005283	H	BL19391	g7695.t1	g10753.t1	g17130.t1	g11122.t2	g4916.t1	g7969.t1	g1481.t1	XP_033745464.1
OG0005284	C1	BL07612	g3921.t1	g15747.t1	g10220.t1	g4402.t1	g12266.t1	g5834.t1	g4180.t1	XP_033750418.1
OG0005285	L	BL06378	g979.t1	g10542.t1	g24141.t1	g5584.t1	g116.t1	g1731.t1	g12764.t1	XP_033738146.1
OG0005286	K	BL23512	g14332.t1	g19641.t1	g27428.t1	g5942.t1	g20668.t1	g18491.t1	g8431.t1	XP_033739750.1
OG0005287	A2	BL00787	g1452.t1	g11236.t1	g25333.t1	g20551.t1	g2340.t1	g3290.t1	g25127.t4	XP_033758597.1
OG0005289	B2	BL11313	g3161.t1	g12903.t1	g29105.t1	g19716.t2	g1186.t1	g480.t1	g19446.t1	XP_033732834.1
OG0005290	H	BL24652	g8902.t1	g10536.t1	g19992.t1	g8102.t1	g20925.t1	g4492.t1	g1908.t1	XP_033738076.1
OG0005291	P	BL14309	g15316.t1	g18479.t1	g26625.t1	g23449.t1	g21552.t3	g17894.t4	g18927.t2	XP_033724623.1
OG0005292	A1a	BL00965	g11161.t1	g17439.t1	g1790.t1	g10627.t1	g16352.t1	g15435.t1	g4585.t1	XP_033735820.1
OG0005293	D	BL02525	g1004.t1	g4228.t1	g24095.t1	g15091.t1	g2463.t1	g1713.t1	g17687.t1	XP_033754561.1
OG0005294	M	BL18491	g19838.t1	g3572.t1	g12775.t2	g13259.t1	g17729.t1	g13604.t2	g24110.t1	XP_033732014.1
OG0005295	H	BL24163	g7257.t1	g22565.t1	g15512.t1	g9142.t1	g4813.t2	g8170.t1	g297.t1	XP_033736706.1
OG0005296	F	BL02844	g12142.t1	g16489.t1	g22505.t1	g12552.t1	g24012.t1	g19327.t1	g15151.t1	XP_033743239.1
OG0005297	L	BL06261	g1423.t1	g2799.t1	g24324.t2	g2069.t1	g2593.t1	g2188.t1	g7879.t2	XP_033739051.1
OG0005298	L	BL08678	g2137.t1	g3889.t1	g23839.t1	g4900.t1	g1794.t1	g2045.t1	g6471.t1	XP_033738813.1
OG0005299	K	BL13593	g14659.t2	g18256.t1	g27196.t1	g1236.t1	g20898.t2	g17671.t1	g8701.t1	XP_033740363.1
OG0005300	J2	BL07707	g3509.t1	g1628.t1	g28848.t1	g5396.t1	g1063.t1	g403.t1	g6465.t1	XP_033738262.1
OG0005302	M	BL22719	g19803.t1	g23581.t1	g12750.t1	g13479.t1	g17108.t1	g13624.t1	g23755.t1	XP_033725493.1
OG0005303	K	BL23323	g11758.t1	g12829.t1	g25190.t1	g3695.t1	g1019.t1	g3412.t1	g8477.t1	XP_033739936.1
OG0005304	A1a	BL01604	g16761.t2	g26452.t1	g5175.t1	g8755.t1	g19243.t1	g12256.t1	g6094.t1	XP_033736297.1
OG0005305	B2	BL11351	g9855.t1	g8629.t1	g19874.t1	g20968.t1	g7014.t1	g4391.t1	g19165.t1	XP_033732993.1
OG0005306	P	BL14261	g14574.t1	g27546.t1	g26505.t1	g22779.t1	g21331.t1	g18318.t1	g18115.t1	XP_033763707.1
OG0005307	A1a	BL01348	g12042.t1	g26325.t1	g3700.t1	g8355.t1	g15809.t1	g14646.t1	g5616.t2	XP_033735217.1
OG0005308	C1	BL07792	g3579.t1	g13605.t1	g28549.t1	g2180.t2	g534.t1	g933.t1	g2403.t1	XP_033750505.1
OG0005309	Ea	BL11952	g2915.t1	g7146.t1	g28972.t1	g18811.t3	g2527.t1	g620.t1	g11831.t3	XP_033746626.1
OG0005310	B2	BL11157	g5784.t1	g5640.t1	g12243.t1	g20254.t1	g12113.t1	g7744.t1	g19475.t1	XP_033733357.1
OG0005312	K	BL13623	g17815.t2	g19787.t2	g18351.t1	g1938.t1	g22626.t1	g21180.t1	g8861.t6	XP_033741185.1
OG0005314	D	BL05458	g1313.t1	g12810.t1	g24572.t1	g15249.t1	g527.t1	g2273.t1	g17513.t1	XP_033754371.1
OG0005315	M	BL11971	g8544.t3	g22880.t1	g16927.t1	g13382.t1	g5842.t1	g9769.t1	g24167.t1	XP_033732333.1
OG0005316	F	BL02900	g13239.t1	g24998.t1	g22434.t1	g12673.t1	g25290.t1	g19340.t1	g14963.t1	XP_033744012.1
OG0005317	G	BL20559	g8798.t1	g15864.t1	g19712.t1	g5338.t1	g7181.t1	g4612.t1	g3595.t1	XP_033747996.1
OG0005318	H	BL19547	g2036.t1	g21609.t1	g29718.t1	g10532.t1	g947.t1	g1551.t1	g1236.t1	XP_033738791.1
OG0005319	D	BL05568	g883.t1	g8607.t1	g25471.t2	g14595.t1	g356.t1	g3181.t1	g17849.t1	XP_033755054.1
OG0005320	O2	BL09747	g13839.t1	g14511.t1	g28024.t1	g4444.t1	g20514.t1	g17011.t1	g8148.t1	XP_033740636.1
OG0005321	K	BL13699	g14962.t1	g12465.t1	g26314.t1	g3136.t2	g19914.t1	g18205.t1	g9565.t2	XP_033740069.1
OG0005322	B2	BL11226	g4981.t1	g12901.t1	g11298.t1	g20660.t1	g10257.t1	g6730.t2	g19412.t1	XP_033732833.1
OG0005323	K	BL23427	g14549.t1	g19861.t1	g26867.t1	g21.t1	g20871.t1	g17584.t1	g8055.t1	XP_033740917.1
OG0005324	P	BL04711	g13767.t1	g11896.t1	g27487.t1	g23800.t2	g20507.t1	g18261.t1	g18761.t1	XP_033763127.1
OG0005325	Qd	BL15306	g2065.t1	g20466.t1	g29670.t1	g10142.t1	g1253.t2	g1473.t1	g1254.t1	XP_033743976.1
OG0005326	C1	BL07215	g10287.t2	g7612.t1	g21121.t2	g5203.t1	g8511.t2	g3794.t2	g2187.t1	XP_033750603.1
OG0005327	J2	BL07752	g6814.t1	g9788.t1	g15925.t1	g1776.t1	g6269.t1	g8901.t2	g7795.t1	XP_033737057.1
OG0005329	O1	BL23974	g1693.t1	g21629.t1	g25315.t1	g4093.t4	g2430.t1	g3313.t1	g12884.t1	XP_033752698.1
OG0005330	I	BL06744	g7752.t2	g2642.t1	g16841.t1	g3403.t1	g3930.t1	g9146.t1	g9826.t1	XP_033757631.1
OG0005331	J2	BL25327	g10141.t1	g3945.t1	g20444.t1	g1774.t1	g8898.t1	g4003.t1	g6754.t1	XP_033739186.1
OG0005332	B1	BL12109	g1780.t1	g18628.t1	g28560.t1	g16055.t1	g617.t1	g940.t1	g22309.t1	XP_033761379.1
OG0005333	P	BL14373	g15137.t1	g12227.t1	g26840.t1	g23142.t1	g21751.t1	g17494.t1	g18843.t1	XP_033764395.1
OG0005334	I	BL21630	g602.t1	g1237.t1	g24982.t1	g2762.t1	g2637.t1	g2595.t1	g9733.t3	XP_033757471.1
OG0005335	G	BL20452	g5773.t1	g16054.t1	g12254.t1	g3679.t1	g9818.t1	g7733.t1	g3493.t1	XP_033747811.1
OG0005336	A2	BL01910	g595.t1	g21054.t1	g24991.t1	g20749.t1	g1734.t1	g2589.t1	g17219.t1	XP_033758595.1
OG0005337	N	BL13970	g12866.t1	g25500.t1	g23592.t1	g6793.t1	g25365.t2	g20146.t1	g15298.t1	XP_033761242.1
OG0005338	H	BL24773	g2249.t1	g9858.t1	g23855.t1	g9205.t1	g671.t1	g1572.t1	g1838.t1	XP_033748582.1
OG0005339	C1	BL07176	g4292.t1	g5475.t1	g10520.t1	g2417.t2	g9613.t1	g6306.t1	g3701.t1	XP_033750712.1
OG0005341	L	BL24348	g1229.t1	g1860.t1	g25428.t1	g1358.t1	g291.t1	g3215.t1	g6261.t1	XP_033737666.1
OG0005342	D	BL10298	g4255.t1	g13533.t1	g9905.t1	g15285.t1	g12339.t1	g5899.t1	g17397.t1	XP_033754652.1
OG0005343	O1	BL23998	g814.t1	g2309.t1	g24688.t1	g995.t1	g500.t1	g2342.t1	g13122.t2	XP_033753496.1
OG0005344	A1a	BL01329	g10613.t1	g29305.t1	g2135.t1	g7669.t1	g15330.t1	g15100.t1	g6174.t1	XP_033735953.1
OG0005345	G	BL20022	g5701.t1	g5873.t1	g12140.t1	g4771.t1	g9964.t1	g7318.t1	g8131.t1	XP_033747462.1
OG0005346	D	BL05254	g6787.t1	g13705.t1	g14390.t1	g15017.t1	g5115.t1	g11144.t1	g17329.t1	XP_033754299.1
OG0005347	A1a	BL01004	g10504.t1	g17864.t2	g2317.t1	g10388.t1	g14925.t2	g15148.t1	g5716.t1	XP_033735283.1
OG0005349	M	BL26935	g1171.t1	g3401.t1	g25364.t1	g12578.t1	g2182.t1	g3267.t1	g24041.t2	XP_033732671.1
OG0005350	K	BL06707	g17829.t1	g11894.t1	g18367.t1	g3685.t1	g23733.t1	g21207.t1	g8299.t1	XP_033741596.1
OG0005351	G	BL20713	g9374.t1	g4426.t1	g20603.t1	g418.t1	g7758.t1	g4075.t1	g2276.t1	XP_033747551.1
OG0005352	M	BL18514	g10832.t1	g23811.t1	g2564.t1	g11679.t2	g2819.t1	g14849.t1	g23963.t1	XP_033732620.1
OG0005353	O1	BL16579	g815.t2	g2308.t1	g24687.t1	g996.t1	g499.t2	g2343.t2	g13753.t1	XP_033752163.1
OG0005354	D	BL26392	g10192.t1	g19151.t1	g19819.t1	g14629.t1	g8161.t1	g4760.t1	g16847.t1	XP_033755506.1
OG0005355	D	BL09525	g4518.t1	g13553.t1	g10356.t2	g15567.t1	g11794.t2	g6126.t1	g17588.t1	XP_033755049.1
OG0005356	N	BL25850	g13069.t1	g8353.t1	g21737.t1	g6127.t1	g25391.t1	g18988.t1	g16200.t1	XP_033759336.1
OG0005357	K	BL23439	g17598.t1	g18892.t1	g17942.t1	g1930.t1	g23616.t1	g20325.t1	g8277.t1	XP_033739830.1
OG0005358	A1a	BL01219	g11572.t1	g17748.t1	g3482.t1	g10003.t2	g15284.t1	g13837.t1	g4645.t1	XP_033734888.1
OG0005359	O2	BL18661	g16861.t1	g13194.t1	g18466.t1	g4760.t1	g23024.t1	g21093.t1	g9385.t1	XP_033739710.1
OG0005360	K	BL20974	g14834.t1	g28257.t1	g26905.t1	g4772.t1	g21423.t1	g17979.t1	g8445.t3	XP_033740633.1
OG0005361	A1a	BL01545	g16405.t1	g19276.t1	g6168.t1	g9439.t1	g19359.t2	g11761.t1	g4853.t2	XP_033734970.1
OG0005362	Ea	BL09328	g7976.t1	g15066.t1	g14889.t1	g17983.t1	g3788.t1	g10147.t1	g11802.t1	XP_033744875.1
OG0005363	P	BL17365	g3251.t1	g12929.t1	g28784.t1	g23106.t2	g3168.t1	g368.t1	g18687.t1	XP_033763570.1
OG0005364	J2	BL07574	g1011.t1	g21422.t1	g24089.t1	g5359.t1	g2466.t1	g1719.t1	g7926.t1	XP_033738258.1
OG0005365	G	BL20261	g6258.t1	g15858.t1	g14747.t1	g1300.t1	g5195.t1	g10898.t1	g2651.t1	XP_033747633.1
OG0005366	Qc	BL14844	g7369.t2	g21817.t1	g15680.t2	g10355.t1	g4105.t2	g8225.t1	g1173.t1	XP_033752781.1
OG0005367	O1	BL24058	g299.t1	g21632.t1	g26007.t1	g4092.t1	g2705.t1	g2945.t1	g12885.t2	XP_033753381.1
OG0005369	G	BL09996	g676.t1	g6803.t1	g24891.t1	g696.t1	g3469.t1	g2644.t1	g2480.t1	XP_033747556.1
OG0005370	N	BL26015	g19014.t1	g8463.t1	g7783.t1	g7381.t1	g14065.t1	g16355.t1	g16295.t1	XP_033759357.1
OG0005371	C1	BL15923	g9815.t1	g8254.t1	g20150.t1	g1640.t1	g9132.t1	g4671.t1	g3885.t1	XP_033750648.1
OG0005372	D	BL05177	g4201.t1	g16334.t1	g9738.t1	g14759.t1	g9563.t1	g5713.t1	g17441.t1	XP_033755190.1
OG0005373	A1a	BL00935	g11039.t1	g17662.t1	g2818.t1	g9488.t2	g14762.t1	g13937.t1	g4802.t1	XP_033733793.1
OG0005374	K	BL19090	g4923.t1	g13365.t1	g11431.t2	g4507.t1	g11123.t1	g7282.t1	g8326.t1	XP_033741269.1
OG0005375	D	BL12882	g4860.t1	g18002.t1	g11351.t1	g14703.t1	g10579.t1	g7326.t1	g17435.t1	XP_033754924.1
OG0005377	K	BL13577	g14575.t1	g11598.t1	g26506.t2	g643.t2	g21330.t3	g18316.t1	g8184.t1	XP_033740068.1
OG0005378	K	BL08378	g14983.t1	g14594.t1	g26425.t1	g5031.t1	g20046.t1	g17714.t1	g8747.t1	XP_033739384.1
OG0005379	F	BL03189	g13528.t1	g8717.t1	g22345.t1	g11873.t2	g23956.t1	g19574.t1	g14563.t6	XP_033743135.1
OG0005380	B3	BL02222	g3203.t1	g7375.t1	g28717.t1	g8093.t1	g3278.t1	g1681.t1	g22113.t1	XP_033728548.1
OG0005381	D	BL02509	g5756.t1	g8185.t1	g11770.t1	g15815.t1	g9800.t1	g7625.t1	g16641.t1	XP_033754504.1
OG0005382	H	BL24836	g4750.t2	g22044.t1	g11222.t1	g10323.t1	g10820.t1	g6756.t1	g453.t1	XP_033749555.1
OG0005383	B3	BL13750	g5620.t1	g4410.t1	g12343.t1	g10012.t1	g9838.t1	g7479.t1	g22136.t1	XP_033728719.1
OG0005384	B2	BL10626	g3608.t1	g21046.t1	g28218.t1	g20158.t1	g93.t1	g1166.t1	g19261.t1	XP_033732965.1
OG0005385	A1a	BL25567	g11783.t1	g19541.t1	g4565.t1	g7611.t1	g15695.t1	g14113.t1	g4730.t1	XP_033734273.1
OG0005386	K	BL23481	g14361.t1	g11857.t1	g27099.t1	g1082.t1	g19988.t1	g18125.t1	g8340.t1	XP_033741105.1
OG0005387	P	BL13995	g13914.t1	g14031.t1	g27556.t1	g23048.t2	g20358.t1	g17969.t1	g18499.t2	XP_033763049.1
OG0005388	R	BL11200	g5738.t1	g13719.t1	g11980.t1	g3821.t1	g9653.t1	g7654.t1	g13682.t1	XP_033752369.1
OG0005389	D	BL02524	g6685.t1	g4229.t1	g16193.t1	g14952.t1	g5897.t1	g8349.t1	g17488.t1	XP_033753939.1
OG0005390	K	BL23363	g14014.t1	g18434.t1	g28075.t1	g1752.t1	g20204.t1	g17023.t1	g8553.t1	XP_033741339.1
OG0005391	K	BL23563	g13954.t1	g14270.t1	g28088.t1	g4730.t1	g20878.t1	g17283.t1	g9467.t1	XP_033739407.1
OG0005392	H	BL19527	g5742.t1	g11281.t1	g11783.t1	g8724.t1	g9813.t1	g7096.t2	g1418.t5	XP_033734723.1
OG0005393	F	BL24513	g12186.t1	g25542.t1	g22805.t1	g11421.t1	g25755.t1	g19676.t1	g13837.t1	XP_033742414.1
OG0005394	A1a	BL22427	g11538.t1	g20297.t1	g4192.t1	g11064.t1	g15754.t1	g14320.t1	g5747.t1	XP_033733833.1
OG0005395	O1	BL16937	g7309.t1	g9808.t1	g15615.t1	g4313.t1	g4961.t2	g8466.t1	g12911.t1	XP_033751749.1
OG0005396	I	BL21799	g309.t2	g21124.t1	g25994.t3	g1336.t1	g2561.t2	g2935.t1	g10732.t1	XP_033755965.1
OG0005397	M	BL26936	g19800.t1	g22817.t1	g12745.t1	g12579.t1	g17088.t1	g13642.t1	g24042.t1	XP_033732672.1
OG0005398	A1a	BL01774	g16034.t1	g17391.t1	g6323.t1	g8537.t1	g18713.t1	g11758.t1	g23909.t1	XP_033733522.1
OG0005399	A1a	BL00628	g15673.t1	g25785.t1	g6511.t1	g8995.t3	g18997.t2	g11502.t1	g5019.t1	XP_033734269.1
OG0005401	A1a	BL00691	g16340.t1	g26010.t1	g6430.t1	g9860.t1	g19396.t1	g11596.t1	g5742.t1	XP_033733984.1
OG0005402	Ea	BL27515	g4063.t1	g18554.t1	g9543.t1	g17773.t1	g11285.t1	g5523.t1	g11518.t1	XP_033746455.1
OG0005403	Ea	BL09374	g3931.t2	g7033.t1	g10263.t1	g18366.t1	g12323.t1	g6256.t1	g12385.t1	XP_033746566.1
OG0005404	Eb	BL28028	g1850.t1	g18705.t1	g28597.t1	g19309.t2	g747.t2	g972.t1	g11245.t1	XP_033745983.1
OG0005405	H	BL24081	g6638.t1	g21770.t1	g16056.t1	g11013.t1	g5054.t1	g8599.t1	g1267.t1	XP_033746735.1
OG0005406	A1a	BL01848	g16473.t1	g29136.t1	g5335.t1	g8811.t1	g18320.t1	g12121.t1	g6166.t1	XP_033733991.1
OG0005407	M	BL26825	g19633.t1	g4039.t1	g12689.t1	g12793.t2	g17208.t1	g13672.t1	g24033.t1	XP_033732726.1
OG0005408	O1	BL21612	g7438.t1	g1212.t1	g15764.t1	g3803.t1	g4302.t2	g8294.t1	g13696.t1	XP_033753086.1
OG0005409	C1	BL15960	g8513.t1	g26841.t1	g16835.t1	g4388.t1	g6327.t1	g9140.t1	g4079.t1	XP_033750825.1
OG0005410	A1a	BL01357	g11057.t1	g17971.t1	g2388.t1	g10389.t1	g15087.t1	g15233.t1	g4940.t1	XP_033733788.1
OG0005411	A1a	BL01621	g16326.t1	g20103.t1	g6439.t1	g8933.t1	g19391.t1	g11592.t1	g5010.t1	XP_033736193.1
OG0005412	H	BL02419	g3126.t1	g1842.t1	g29161.t1	g7543.t1	g1316.t1	g450.t1	g1970.t1	XP_033739195.1
OG0005413	F	BL02912	g13254.t1	g25009.t1	g22520.t1	g13072.t1	g24920.t1	g19413.t1	g14684.t1	XP_033742780.1
OG0005414	J1	BL17125	g3961.t1	g896.t1	g10173.t1	g21349.t1	g12273.t1	g5869.t1	g25297.t1	XP_033727838.1
OG0005415	J1	BL17626	g6037.t1	g10811.t1	g12110.t1	g22521.t1	g11321.t1	g7341.t1	g25336.t1	XP_033726671.1
OG0005416	Ea	BL12586	g191.t1	g7287.t1	g25790.t1	g19012.t1	g3160.t1	g2753.t1	g11265.t1	XP_033745156.1
OG0005417	O2	BL11598	g14689.t1	g18349.t1	g27035.t1	g2436.t1	g20911.t1	g17392.t1	g8344.t1	XP_033739669.1
OG0005418	L	BL12501	g12127.t1	g18220.t1	g4441.t1	g1998.t1	g21678.t1	g14005.t1	g7743.t1	XP_033737005.1
OG0005420	M	BL13084	g6132.t1	g22836.t1	g11739.t2	g12221.t1	g10759.t1	g7257.t1	g23899.t1	XP_033732664.1
OG0005421	D	BL05509	g1548.t1	g27153.t1	g24056.t1	g15730.t1	g1363.t1	g19387.t1	g16762.t1	XP_033754411.1
OG0005422	K	BL20938	g17060.t1	g19685.t1	g17585.t1	g1044.t1	g22663.t1	g20257.t1	g8678.t1	XP_033739778.1
OG0005423	B1	BL17210	g4342.t1	g8976.t1	g10599.t1	g17052.t1	g12257.t1	g6339.t1	g22680.t1	XP_033762015.1
OG0005424	J2	BL06990	g7175.t1	g21142.t1	g15396.t1	g3096.t1	g6431.t1	g8090.t1	g6838.t1	XP_033737696.1
OG0005425	J2	BL07687	g9884.t1	g1755.t1	g20065.t1	g5806.t1	g7955.t1	g4520.t1	g7722.t1	XP_033739058.1
OG0005426	N	BL10820	g16857.t1	g25182.t1	g18285.t1	g6225.t1	g23710.t1	g21248.t1	g15523.t1	XP_033761201.1
OG0005427	A1b	BL01865	g16471.t1	g17887.t1	g5339.t1	g7619.t1	g18319.t1	g12107.t1	g4416.t1	XP_033735679.1
OG0005428	R	BL21149	g1242.t1	g21668.t1	g24623.t1	g5828.t1	g2908.t1	g2382.t1	g12636.t1	XP_033751540.1
OG0005429	C1	BL07293	g10110.t1	g8905.t1	g21229.t1	g2495.t1	g8659.t1	g4156.t1	g4047.t1	XP_033750056.1
OG0005430	J2	BL07608	g3253.t1	g9990.t1	g28787.t1	g5477.t1	g3170.t1	g370.t1	g6680.t1	XP_033737320.1
OG0005431	I	BL08091	g8925.t1	g21902.t1	g19933.t1	g2616.t1	g6904.t2	g4472.t1	g10869.t1	XP_033757005.1
OG0005432	O1	BL16469	g1879.t1	g21977.t2	g28621.t1	g2029.t1	g2143.t1	g992.t1	g12772.t1	XP_033752423.1
OG0005433	H	BL24654	g4517.t1	g1864.t1	g10355.t1	g10606.t1	g11793.t1	g6131.t1	g249.t1	XP_033747905.1
OG0005434	Eb	BL27435	g4881.t1	g7090.t1	g11387.t1	g18837.t1	g10368.t1	g6876.t1	g11368.t1	XP_033745008.1
OG0005435	N	BL26003	g19018.t1	g25623.t1	g7953.t1	g7016.t1	g14045.t1	g16627.t1	g16228.t1	XP_033759333.1
OG0005436	H	BL09051	g5396.t1	g2122.t1	g11890.t1	g10466.t1	g11861.t1	g7176.t1	g1755.t1	XP_033739876.1
OG0005437	J1	BL22919	g1919.t1	g10022.t1	g29914.t1	g22340.t1	g3558.t1	g1613.t1	g25482.t1	XP_033726914.1
OG0005438	G	BL19999	g3460.t1	g7752.t1	g28914.t1	g4695.t1	g2966.t1	g561.t1	g4005.t1	XP_033748497.1
OG0005439	R	BL22613	g5412.t1	g23284.t1	g11870.t2	g5874.t1	g12132.t1	g7161.t1	g12997.t1	XP_033752304.1
OG0005440	B2	BL03361	g7717.t1	g6468.t1	g16768.t1	g19617.t2	g6082.t1	g9113.t1	g19404.t1	XP_033732178.1
OG0005441	L	BL24379	g2082.t1	g23197.t1	g23790.t1	g535.t1	g1269.t1	g1971.t1	g7870.t1	XP_033737225.1
OG0005442	A1a	BL01616	g11809.t1	g29212.t1	g3915.t1	g7978.t1	g14632.t1	g14504.t1	g5834.t1	XP_033734669.1
OG0005443	J2	BL07712	g9975.t1	g1151.t2	g19196.t1	g2201.t1	g7948.t1	g5172.t2	g6487.t1	XP_033737269.1
OG0005444	B1	BL17233	g9664.t1	g5721.t1	g20372.t1	g16615.t1	g8196.t1	g4277.t1	g22533.t1	XP_033761999.1
OG0005445	I	BL21874	g6646.t1	g3333.t1	g16068.t1	g5639.t1	g5888.t1	g8612.t1	g9691.t1	XP_033757303.1
OG0005446	B1	BL12095	g8471.t1	g12951.t1	g16558.t1	g16382.t1	g6345.t1	g8891.t1	g22254.t1	XP_033761881.1
OG0005447	C1	BL07517	g1019.t1	g5075.t1	g25154.t1	g4376.t1	g3230.t1	g3451.t1	g2012.t1	XP_033749787.1
OG0005448	I	BL17597	g2064.t1	g9939.t1	g29671.t1	g2673.t3	g1252.t1	g1474.t2	g10691.t2	XP_033756935.1
OG0005449	O2	BL18668	g14262.t1	g11697.t1	g27650.t1	g4487.t1	g21325.t1	g18397.t1	g8460.t1	XP_033739704.1
OG0005450	A1a	BL01363	g10978.t1	g19317.t1	g2646.t1	g9721.t1	g15942.t1	g13883.t1	g5488.t1	XP_033735453.1
OG0005451	D	BL05555	g19024.t1	g24474.t1	g7957.t1	g14140.t1	g13494.t1	g16633.t1	g17533.t1	XP_033754821.1
OG0005452	A1b	BL01415	g15669.t1	g29353.t1	g6516.t1	g9059.t1	g19692.t1	g11498.t1	g6214.t1	XP_033733739.1
OG0005453	C1	BL07425	g7696.t1	g8863.t1	g17131.t1	g5225.t1	g4917.t1	g7968.t1	g3911.t1	XP_033750777.1
OG0005454	O2	BL09766	g15146.t1	g13155.t1	g26922.t1	g3530.t1	g20454.t1	g17503.t1	g8139.t1	XP_033739915.1
OG0005455	O1	BL22276	g8262.t1	g20987.t1	g16487.t1	g523.t1	g4170.t1	g8048.t1	g13189.t1	XP_033751249.1
OG0005456	A2	BL01962	g1249.t1	g849.t1	g24615.t1	g20200.t1	g3334.t1	g2389.t1	g24472.t1	XP_033758582.1
OG0005457	G	BL19988	g5254.t1	g19133.t1	g10909.t1	g5950.t1	g10936.t1	g6483.t1	g4067.t1	XP_033747929.1
OG0005458	C1	BL07282	g10290.t1	g8539.t1	g21154.t1	g1258.t1	g6963.t1	g3761.t1	g4229.t1	XP_033750451.1
OG0005459	F	BL02998	g19348.t1	g24958.t1	g8259.t1	g12386.t3	g12944.t1	g16280.t1	g14907.t1	XP_033742812.1
OG0005460	Eb	BL27634	g9871.t1	g8869.t1	g20155.t1	g18562.t1	g7330.t1	g4404.t1	g12334.t1	XP_033744664.1
OG0005461	G	BL20241	g937.t1	g7060.t1	g24218.t1	g5078.t1	g2546.t1	g2136.t1	g3486.t1	XP_033748083.1
OG0005462	L	BL06337	g3470.t1	g3752.t1	g28923.t1	g3560.t1	g2351.t1	g570.t1	g6898.t1	XP_033737344.1
OG0005463	D	BL12432	g9572.t2	g10685.t1	g20482.t1	g14439.t1	g9246.t1	g3903.t1	g17693.t2	XP_033754526.1
OG0005464	O2	BL17917	g14965.t1	g13379.t2	g26203.t1	g4468.t2	g20232.t1	g18253.t1	g8699.t1	XP_033741013.1
OG0005465	J1	BL08582	g7059.t1	g3351.t1	g16215.t1	g21781.t1	g4838.t1	g8371.t1	g26139.t1	XP_033726633.1
OG0005466	R	BL10725	g2281.t1	g2320.t1	g23671.t1	g5367.t1	g892.t1	g1505.t1	g13377.t4	XP_033751358.1
OG0005467	O1	BL04520	g2780.t1	g22005.t1	g28429.t1	g3000.t1	g1422.t1	g1104.t1	g13694.t1	XP_033751574.1
OG0005468	P	BL14612	g14769.t1	g18423.t1	g27760.t1	g23332.t1	g21725.t1	g16951.t1	g18915.t1	XP_033764242.1
OG0005469	B1	BL04369	g3302.t1	g12330.t1	g29334.t2	g16196.t1	g1161.t1	g822.t2	g22177.t2	XP_033761940.1
OG0005470	H	BL19390	g2660.t1	g1556.t1	g28659.t1	g8718.t1	g2502.t2	g1022.t1	g1825.t1	XP_033743927.1
OG0005471	Qd	BL15122	g2908.t1	g2815.t1	g28982.t1	g11041.t1	g2521.t1	g625.t1	g329.t1	XP_033732465.1
OG0005472	P	BL14600	g14955.t1	g14094.t1	g26602.t1	g23336.t3	g21230.t2	g18096.t1	g18894.t1	XP_033724812.1
OG0005473	N	BL26231	g18840.t1	g24675.t1	g8488.t1	g7280.t1	g13234.t1	g15595.t2	g15300.t1	XP_033760157.1
OG0005474	K	BL20963	g18066.t1	g19640.t1	g18087.t1	g3369.t1	g23752.t1	g20523.t1	g8719.t1	XP_033740537.1
OG0005475	G	BL20079	g4799.t1	g13535.t1	g11172.t1	g917.t1	g9881.t1	g6793.t1	g4006.t1	XP_033748786.1
OG0005476	O1	BL22271	g2769.t1	g3698.t1	g29634.t1	g2139.t1	g3418.t1	g1446.t1	g12687.t1	XP_033753236.1
OG0005477	B1	BL04366	g1943.t2	g12331.t1	g29896.t1	g16038.t1	g3526.t1	g1599.t1	g22302.t1	XP_033763018.1
OG0005478	D	BL12885	g1228.t2	g12807.t2	g25427.t2	g13860.t2	g290.t2	g3216.t1	g17215.t1	XP_033755480.1
OG0005479	G	BL04012	g4482.t1	g8179.t1	g10375.t1	g320.t1	g12456.t1	g6501.t1	g3698.t1	XP_033747445.1
OG0005480	C1	BL07387	g4270.t1	g8963.t1	g9913.t1	g3330.t1	g11061.t1	g6053.t1	g2620.t1	XP_033750566.1
OG0005481	J2	BL03276	g2596.t1	g22330.t1	g29590.t1	g2835.t1	g2427.t2	g1413.t1	g6723.t1	XP_033737441.1
OG0005482	N	BL13897	g19050.t1	g9053.t1	g8022.t1	g6122.t1	g12794.t1	g16751.t2	g15302.t1	XP_033760962.1
OG0005483	J2	BL07750	g43.t1	g3299.t1	g26122.t1	g2198.t1	g2122.t1	g2863.t1	g6484.t1	XP_033737267.1
OG0005484	G	BL04011	g4630.t1	g3958.t1	g11087.t1	g5266.t1	g11981.t1	g7883.t1	g4113.t1	XP_033747431.1
OG0005485	D	BL19649	g8438.t1	g6526.t1	g15949.t1	g15532.t1	g6295.t1	g8881.t1	g24886.t1	XP_033753996.1
OG0005486	G	BL19947	g5713.t1	g8642.t1	g11611.t1	g4741.t1	g11240.t1	g7009.t1	g4165.t1	XP_033747739.1
OG0005487	M	BL18273	g19932.t2	g3978.t2	g12765.t1	g11242.t1	g17016.t1	g13634.t1	g24284.t5	XP_033729610.1
OG0005491	N	BL21086	g13178.t1	g25338.t1	g22603.t2	g7112.t1	g25606.t2	g18686.t2	g15540.t1	XP_033761234.1
OG0005492	B2	BL11168	g6116.t1	g4215.t1	g12500.t1	g19719.t1	g10718.t1	g7600.t1	g19362.t1	XP_033724586.1
OG0005493	O1	BL16520	g15792.t1	g11184.t1	g6276.t1	g1529.t1	g18737.t1	g11718.t1	g12710.t1	XP_033752458.1
OG0005494	I	BL27116	g2196.t1	g10262.t1	g23702.t1	g3981.t1	g2295.t1	g2097.t1	g11069.t1	XP_033756022.1
OG0005496	D	BL05329	g7099.t1	g7415.t1	g16428.t1	g14458.t1	g5642.t1	g9001.t1	g17599.t1	XP_033755644.1
OG0005497	F	BL03034	g19099.t1	g24064.t1	g7909.t1	g13197.t1	g12706.t1	g16373.t1	g15161.t1	XP_033743531.1
OG0005498	H	BL24733	g3040.t1	g2952.t1	g29251.t1	g10078.t1	g1226.t1	g751.t1	g62.t1	XP_033755477.1
OG0005499	A1a	BL01012	g16054.t1	g17874.t1	g6534.t1	g8855.t2	g18303.t1	g11337.t1	g4972.t1	XP_033734745.1
OG0005500	F	BL26483	g13618.t1	g25326.t1	g21991.t1	g11907.t1	g24753.t1	g18764.t1	g15146.t1	XP_033743989.1
OG0005501	C1	BL25135	g7072.t3	g18712.t1	g16401.t1	g2657.t1	g3911.t5	g9022.t1	g2321.t4	XP_033749599.1
OG0005502	D	BL12033	g19973.t1	g15230.t1	g13391.t1	g15059.t1	g17240.t1	g12692.t1	g17416.t2	XP_033754796.1
OG0005503	D	BL05079	g8131.t1	g12752.t1	g15282.t1	g15422.t1	g5292.t3	g10042.t1	g17823.t1	XP_033755591.1
OG0005504	D	BL05566	g8329.t2	g27057.t1	g15007.t2	g13966.t1	g5449.t1	g9924.t1	g17587.t1	XP_033755604.1
OG0005505	Eb	BL27520	g18043.t1	g18198.t1	g17751.t1	g18426.t1	g23265.t1	g20381.t1	g11174.t1	XP_033746316.1
OG0005506	G	BL20028	g3995.t2	g19170.t1	g10244.t2	g4705.t1	g9748.t2	g6066.t2	g2057.t1	XP_033747631.1
OG0005507	B1	BL04289	g4181.t1	g12922.t1	g10014.t1	g16061.t1	g10893.t1	g6005.t1	g22256.t3	XP_033762911.1
OG0005508	D	BL05438	g6630.t1	g5705.t1	g16047.t1	g15228.t1	g5042.t1	g8590.t1	g16699.t1	XP_033754850.1
OG0005509	F	BL02926	g13025.t4	g24235.t1	g21691.t1	g13182.t1	g25094.t4	g18924.t2	g13903.t5	XP_033743947.1
OG0005510	Ea	BL27401	g1340.t1	g12648.t1	g24536.t1	g18887.t1	g721.t1	g2250.t1	g12349.t2	XP_033745069.1
OG0005511	G	BL20707	g5990.t1	g6078.t1	g12159.t1	g5050.t1	g11399.t1	g7832.t1	g3728.t1	XP_033748293.1
OG0005512	G	BL09989	g5808.t1	g26923.t1	g12220.t1	g4538.t3	g11567.t1	g7769.t1	g4230.t1	XP_033747932.1
OG0005513	D	BL00086	g9846.t1	g8543.t1	g20236.t1	g15135.t1	g8995.t1	g4341.t1	g16591.t1	XP_033753931.1
OG0005514	N	BL25859	g18720.t2	g25532.t1	g7925.t1	g6618.t1	g13205.t1	g16365.t1	g15936.t1	XP_033760616.1
OG0005515	N	BL26236	g13636.t1	g8458.t1	g21972.t1	g6628.t1	g25154.t1	g18785.t1	g15553.t1	XP_033759377.1
OG0005516	P	BL04697	g15340.t1	g14353.t1	g27960.t1	g22811.t1	g20363.t1	g16884.t1	g18720.t1	XP_033763599.1
OG0005517	B2	BL25077	g4763.t1	g7656.t1	g11202.t1	g19943.t2	g11702.t1	g6768.t1	g19480.t1	XP_033730589.1
OG0005518	K	BL20835	g14916.t1	g14281.t1	g26550.t1	g2092.t1	g20737.t4	g18077.t1	g8687.t1	XP_033739795.1
OG0005519	F	BL02550	g12327.t2	g25494.t1	g22230.t1	g12721.t4	g24636.t1	g19045.t1	g14975.t1	XP_033743757.1
OG0005520	N	BL25870	g16375.t2	g9025.t1	g4956.t1	g7032.t1	g18238.t1	g12408.t1	g15639.t1	XP_033759816.1
OG0005521	D	BL05107	g9608.t2	g4633.t1	g20526.t1	g15073.t1	g7085.t1	g3864.t1	g17391.t1	XP_033755376.1
OG0005523	M	BL18562	g17880.t2	g13234.t1	g17771.t1	g11878.t1	g22621.t1	g20420.t1	g24265.t1	XP_033731934.1
OG0005524	K	BL23360	g17038.t1	g12289.t2	g17347.t1	g2368.t2	g22361.t2	g20547.t1	g8694.t2	XP_033739648.1
OG0005525	C1	BL07369	g5464.t1	g7994.t1	g11620.t1	g5256.t1	g12404.t1	g7018.t1	g2001.t1	XP_033750039.1
OG0005526	B3	BL26616	g5675.t1	g6872.t1	g12398.t1	g9370.t1	g9780.t1	g7521.t1	g22042.t1	XP_033728534.1
OG0005527	H	BL24689	g5186.t1	g22389.t1	g10772.t1	g10469.t1	g10696.t1	g6385.t1	g1985.t2	XP_033736698.1
OG0005528	K	BL23581	g11541.t1	g14821.t1	g4189.t1	g3869.t1	g14704.t1	g14317.t1	g8167.t1	XP_033740104.1
OG0005529	N	BL21069	g13154.t1	g25551.t1	g23320.t1	g7395.t1	g24287.t1	g19877.t1	g15569.t3	XP_033759395.1
OG0005530	Qa	BL14962	g3197.t1	g2047.t1	g28711.t1	g8486.t1	g632.t1	g1677.t1	g184.t1	XP_033736782.1
OG0005531	C1	BL07368	g707.t1	g13409.t1	g25508.t1	g4592.t1	g3445.t1	g3149.t1	g4182.t1	XP_033749727.1
OG0005532	F	BL26568	g12937.t1	g10269.t1	g23336.t1	g11810.t2	g24789.t1	g19857.t2	g15205.t1	XP_033742551.1
OG0005533	F	BL03186	g19186.t1	g24693.t1	g8149.t1	g12285.t1	g14272.t1	g16216.t1	g14992.t1	XP_033742900.1
OG0005534	M	BL13054	g19486.t1	g4019.t1	g13524.t1	g12986.t1	g17346.t1	g13394.t1	g23860.t1	XP_033731972.1
OG0005535	Ea	BL27893	g5417.t1	g8234.t1	g11851.t1	g19242.t1	g10238.t1	g7158.t2	g11513.t1	XP_033745976.1
OG0005536	A1a	BL22386	g11947.t1	g17274.t1	g3245.t1	g8135.t1	g16517.t1	g14252.t1	g4884.t1	XP_033735762.1
OG0005537	I	BL21654	g3497.t1	g10200.t1	g28863.t1	g2778.t2	g3369.t1	g686.t1	g10830.t2	XP_033757599.1
OG0005538	P	BL04755	g11031.t1	g15644.t1	g2815.t1	g23364.t1	g16130.t1	g13934.t1	g18993.t1	XP_033764352.1
OG0005539	Ea	BL27884	g6148.t1	g8781.t1	g11721.t1	g18378.t1	g10470.t1	g6847.t1	g11569.t1	XP_033744749.1
OG0005540	Ea	BL17489	g4332.t1	g18553.t1	g10538.t1	g19137.t1	g9550.t1	g6320.t1	g11767.t1	XP_033746046.1
OG0005541	F	BL03011	g13152.t1	g14655.t1	g22186.t1	g11660.t1	g25666.t1	g18587.t1	g14792.t1	XP_033742292.1
OG0005542	K	BL23506	g17651.t2	g14505.t1	g18872.t1	g210.t1	g23347.t2	g21322.t1	g8510.t2	XP_033739392.1
OG0005543	A1a	BL01328	g10979.t1	g25853.t1	g2645.t2	g7670.t2	g15941.t2	g13882.t1	g6171.t1	XP_033736326.1
OG0005544	A1b	BL01154	g12109.t1	g26142.t1	g3868.t1	g9456.t1	g15904.t1	g14631.t1	g4356.t1	XP_033734029.1
OG0005545	K	BL23493	g14588.t1	g12172.t1	g26447.t1	g5597.t1	g21100.t2	g18373.t1	g8283.t1	XP_033741061.1
OG0005546	F	BL02801	g18713.t1	g8336.t1	g7946.t1	g11337.t1	g12647.t1	g16605.t2	g14447.t1	XP_033743483.1
OG0005547	L	BL05938	g3157.t1	g23034.t1	g29109.t1	g2476.t1	g1182.t1	g477.t1	g6741.t1	XP_033737837.1
OG0005549	C1	BL07276	g9446.t1	g27334.t1	g19751.t1	g2446.t1	g8719.t1	g4807.t1	g2102.t1	XP_033750684.1
OG0005550	F	BL02663	g13068.t1	g24353.t1	g21736.t1	g12070.t1	g25788.t1	g18989.t2	g14981.t2	XP_033742401.1
OG0005551	F	BL02832	g18961.t1	g24880.t1	g7852.t1	g13427.t1	g12660.t1	g16228.t1	g14925.t1	XP_033742233.1
OG0005552	A1a	BL01039	g10882.t1	g25669.t1	g3076.t1	g7804.t1	g15395.t1	g14479.t1	g5584.t1	XP_033734062.1
OG0005553	M	BL21264	g10910.t1	g23722.t1	g3034.t1	g12483.t2	g16467.t3	g14577.t1	g23837.t1	XP_033762871.1
OG0005554	I	BL21636	g10042.t1	g1481.t1	g19566.t1	g2759.t1	g6744.t1	g5018.t1	g10715.t1	XP_033757773.1
OG0005555	Qb	BL26775	g8242.t1	g10786.t1	g16594.t1	g9643.t1	g4767.t1	g8974.t1	g104.t1	XP_033744545.1
OG0005556	D	BL12910	g3531.t1	g12505.t1	g28470.t1	g15134.t1	g2328.t1	g865.t1	g17436.t1	XP_033755097.1
OG0005557	C1	BL07905	g6278.t1	g15774.t1	g14722.t1	g4595.t1	g5253.t1	g10919.t1	g3984.t1	XP_033749853.1
OG0005558	D	BL05143	g7467.t1	g14859.t1	g16152.t1	g14638.t1	g6566.t2	g8673.t1	g16850.t1	XP_033755620.1
OG0005559	C1	BL07502	g10314.t1	g18290.t1	g21247.t1	g306.t1	g9383.t1	g4172.t1	g2837.t1	XP_033749250.1
OG0005560	O2	BL18648	g13974.t2	g11487.t1	g28098.t1	g5293.t3	g21506.t1	g17262.t1	g8494.t1	XP_033741046.1
OG0005561	N	BL26171	g12298.t1	g25540.t1	g22934.t1	g6509.t1	g24527.t1	g19467.t1	g15289.t1	XP_033760140.1
OG0005562	A2	BL01107	g368.t1	g21931.t1	g25666.t1	g19560.t1	g1576.t3	g3103.t2	g24906.t3	XP_033757943.1
OG0005563	F	BL02788	g19057.t1	g25089.t1	g8025.t1	g12284.t1	g12793.t1	g16754.t1	g14988.t1	XP_033742923.1
OG0005564	F	BL24601	g19394.t1	g8428.t1	g8571.t1	g12257.t1	g13435.t1	g15633.t1	g15111.t1	XP_033743415.1
OG0005565	K	BL06545	g15315.t1	g19686.t1	g26624.t1	g4482.t1	g21554.t1	g17893.t1	g8608.t1	XP_033740058.1
OG0005567	M	BL18407	g12565.t2	g23592.t1	g21596.t1	g13447.t1	g25484.t1	g19396.t1	g24016.t1	XP_033762899.1
OG0005570	M	BL26875	g20160.t1	g3387.t1	g14190.t1	g12791.t1	g18122.t1	g12435.t1	g24031.t1	XP_033732728.1
OG0005571	N	BL26011	g13632.t1	g9419.t1	g21974.t1	g6027.t1	g25151.t1	g18782.t1	g15684.t1	XP_033759413.1
OG0005573	M	BL11999	g13611.t1	g23442.t1	g22706.t1	g12890.t1	g24557.t1	g19376.t1	g24364.t2	XP_033731168.1
OG0005574	K	BL23487	g17496.t1	g12105.t1	g17698.t1	g5859.t1	g22537.t1	g20294.t1	g8625.t1	XP_033741111.1
OG0005575	N	BL25764	g12840.t1	g25586.t1	g23368.t1	g6396.t1	g24046.t1	g20019.t1	g15297.t1	XP_033760412.1
OG0005576	B2	BL10588	g5403.t1	g5127.t1	g11879.t1	g19717.t1	g12464.t1	g7168.t1	g19269.t2	XP_033732625.1
OG0005577	A1a	BL01302	g11821.t1	g17198.t1	g3979.t1	g8817.t1	g15048.t1	g13742.t1	g5599.t1	XP_033735080.1
OG0005578	P	BL17434	g15212.t1	g19629.t1	g27812.t1	g22756.t1	g20633.t1	g17228.t1	g18906.t1	XP_033764092.1
OG0005579	Qa	BL26742	g13645.t1	g24828.t1	g21964.t1	g9345.t1	g25468.t1	g18792.t1	g1821.t1	XP_033738720.1
OG0005580	Qa	BL14914	g6080.t1	g1624.t1	g12066.t1	g10447.t1	g10846.t1	g7383.t1	g1740.t1	XP_033753847.1
OG0005581	N	BL26144	g12651.t1	g24677.t1	g22472.t1	g6580.t1	g25719.t1	g19081.t1	g15592.t1	XP_033759410.1
OG0005582	M	BL13076	g9878.t1	g23707.t1	g20168.t1	g11307.t1	g7320.t1	g4413.t1	g23739.t2	XP_033730768.1
OG0005583	L	BL05872	g14848.t1	g18299.t1	g26820.t1	g1503.t1	g21695.t1	g17862.t3	g7677.t1	XP_033737200.1
OG0005584	B3	BL12331	g5672.t1	g6868.t1	g12395.t2	g10302.t1	g9784.t1	g7518.t1	g21740.t1	XP_033728297.1
OG0005585	N	BL10788	g12760.t1	g9229.t1	g22399.t1	g7200.t1	g24307.t3	g18561.t1	g16330.t1	XP_033760862.1
OG0005586	D	BL19681	g9744.t2	g23901.t1	g20802.t3	g15606.t4	g7207.t2	g3598.t1	g17637.t1	XP_033753672.1
OG0005587	Ea	BL27954	g4145.t1	g4732.t1	g9797.t1	g17920.t1	g11084.t1	g5726.t1	g11629.t1	XP_033744709.1
OG0005588	Ea	BL27664	g8903.t1	g15490.t1	g19990.t2	g17675.t2	g8009.t2	g4493.t2	g11289.t1	XP_033745371.1
OG0005589	G	BL04010	g8967.t1	g7735.t1	g19894.t1	g5265.t1	g8348.t1	g4450.t2	g2312.t1	XP_033747433.1
OG0005590	A1a	BL00782	g11448.t1	g17692.t1	g4795.t2	g7740.t3	g14484.t1	g14423.t1	g5292.t1	XP_033734444.1
OG0005591	F	BL26544	g13036.t1	g16892.t1	g21713.t1	g12140.t1	g24548.t1	g19265.t1	g14905.t1	XP_033743023.1
OG0005592	B1	BL12629	g4441.t1	g4629.t1	g10105.t1	g15874.t1	g9642.t1	g5912.t1	g22553.t1	XP_033762536.1
OG0005593	K	BL23590	g2823.t1	g27539.t1	g29055.t1	g4434.t1	g49.t1	g509.t1	g8766.t1	XP_033739652.1
OG0005594	K	BL20823	g14682.t1	g13115.t1	g27045.t1	g400.t1	g20914.t1	g17399.t1	g8337.t1	XP_033741099.1
OG0005595	K	BL13713	g14778.t1	g13125.t1	g27772.t1	g3666.t1	g20980.t1	g17133.t1	g9432.t2	XP_033740147.1
OG0005597	Eb	BL27691	g386.t1	g4563.t1	g25637.t1	g18086.t1	g1934.t1	g3081.t1	g11186.t2	XP_033746593.1
OG0005598	Qc	BL14845	g1903.t2	g21816.t1	g28642.t1	g10808.t1	g716.t1	g1012.t1	g1311.t1	XP_033740709.1
OG0005599	Ea	BL27453	g333.t1	g3957.t1	g25971.t2	g18835.t1	g1379.t1	g2912.t1	g12356.t1	XP_033746389.1
OG0005600	G	BL03917	g2336.t1	g7177.t1	g30025.t1	g5765.t1	g1011.t1	g1320.t1	g2080.t1	XP_033747219.1
OG0005601	B1	BL17248	g9388.t2	g19063.t1	g20578.t1	g16863.t1	g7077.t1	g4039.t1	g22669.t1	XP_033762741.1
OG0005602	M	BL11993	g11163.t1	g3429.t1	g2396.t1	g12040.t1	g14726.t1	g14953.t1	g23957.t1	XP_033732332.1
OG0005603	J2	BL07331	g8413.t1	g2198.t1	g16964.t1	g4013.t1	g4598.t1	g9802.t1	g7934.t1	XP_033738672.1
OG0005604	A1b	BL00853	g11793.t1	g17761.t2	g4572.t1	g10496.t2	g15801.t1	g14101.t1	g4558.t1	XP_033734816.1
OG0005605	A1a	BL00685	g16775.t1	g20087.t1	g5110.t1	g7821.t1	g23951.t2	g12305.t1	g4917.t2	XP_033734846.1
OG0005606	N	BL25961	g13623.t1	g24568.t1	g21986.t2	g6670.t1	g24728.t1	g18773.t2	g15443.t1	XP_033759927.1
OG0005607	C1	BL15939	g10378.t1	g12630.t1	g21361.t1	g314.t1	g8325.t1	g3512.t2	g4004.t1	XP_033749460.1
OG0005608	C1	BL25222	g1268.t1	g13899.t1	g24596.t1	g738.t1	g2827.t1	g2408.t1	g2300.t1	XP_033749354.1
OG0005609	A1a	BL00933	g3926.t1	g8554.t1	g10222.t1	g10240.t1	g12268.t1	g5832.t1	g4749.t1	XP_033735214.1
OG0005611	F	BL02561	g13064.t4	g8328.t3	g21730.t2	g11734.t1	g25786.t1	g18995.t2	g14866.t2	XP_033742353.1
OG0005612	A1a	BL01872	g15646.t1	g25983.t1	g6525.t1	g10439.t2	g18258.t2	g11492.t1	g16446.t1	XP_033734431.1
OG0005613	B2	BL10611	g9463.t1	g5779.t1	g19662.t1	g19895.t1	g6999.t1	g4593.t1	g19216.t2	XP_033728178.1
OG0005614	D	BL05411	g9898.t1	g13573.t1	g20038.t1	g15573.t1	g8070.t1	g4510.t1	g16582.t1	XP_033754507.1
OG0005615	P	BL14140	g14970.t1	g28390.t1	g26408.t1	g23506.t1	g21410.t3	g17729.t1	g18796.t4	XP_033764183.1
OG0005617	P	BL17385	g17029.t1	g18231.t1	g17175.t1	g23294.t1	g22372.t1	g20792.t1	g18912.t1	XP_033764367.1
OG0005618	A1a	BL01220	g10884.t2	g17641.t1	g3084.t1	g8225.t3	g15388.t1	g14480.t1	g6227.t1	XP_033735108.1
OG0005619	H	BL09121	g5184.t1	g22075.t1	g11510.t2	g9108.t3	g12389.t1	g6897.t1	g1630.t1	XP_033746839.1
OG0005620	F	BL26450	g17837.t1	g25209.t1	g18374.t1	g12137.t1	g22267.t1	g21214.t1	g14687.t1	XP_033742420.1
OG0005621	P	BL14320	g13891.t3	g27812.t1	g28046.t2	g23582.t1	g20580.t1	g17042.t2	g18072.t1	XP_033763055.1
OG0005622	C1	BL07224	g9794.t1	g6925.t1	g20264.t3	g313.t2	g9421.t1	g4374.t3	g2680.t1	XP_033750220.1
OG0005623	O2	BL23698	g13887.t1	g18168.t1	g28014.t1	g1584.t1	g21714.t1	g17164.t1	g8632.t1	XP_033739658.1
OG0005625	K	BL06711	g14860.t8	g13160.t1	g26943.t3	g4723.t2	g21050.t1	g17526.t1	g9413.t1	XP_033741735.1
OG0005626	A1a	BL00967	g11516.t1	g20312.t1	g4581.t1	g8263.t1	g16603.t1	g14095.t1	g5015.t1	XP_033735620.1
OG0005627	M	BL18375	g19988.t1	g23705.t1	g13688.t1	g13487.t1	g18007.t1	g13342.t1	g24060.t1	XP_033732586.1
OG0005628	H	BL24832	g8203.t1	g1651.t1	g14473.t1	g10751.t1	g6174.t2	g11075.t1	g1736.t1	XP_033736395.1
OG0005629	G	BL20398	g5901.t1	g26802.t1	g11804.t1	g726.t1	g10390.t1	g7083.t1	g2155.t2	XP_033747094.1
OG0005630	N	BL25991	g12698.t1	g24072.t1	g22053.t1	g6153.t1	g24834.t1	g19166.t1	g16304.t1	XP_033760377.1
OG0005631	P	BL04777	g16901.t1	g12973.t2	g17351.t1	g23404.t2	g22306.t1	g20587.t1	g18628.t1	XP_033763689.1
OG0005632	D	BL04984	g3939.t3	g7738.t1	g10254.t2	g14579.t3	g12039.t4	g6261.t1	g16478.t1	XP_033754012.1
OG0005633	A2	BL01142	g898.t1	g10109.t1	g24655.t1	g20301.t1	g2920.t1	g2368.t1	g25037.t1	XP_033757980.1
OG0005634	Ea	BL12585	g190.t1	g7286.t1	g25789.t2	g19013.t1	g3159.t2	g2754.t3	g11266.t1	XP_033745153.1
OG0005635	D	BL05422	g10316.t1	g6370.t1	g20902.t1	g15281.t1	g7275.t2	g3890.t1	g17351.t1	XP_033754247.1
OG0005636	K	BL23532	g14826.t1	g14053.t1	g26896.t1	g1307.t1	g21400.t1	g17607.t1	g9379.t1	XP_033739622.1
OG0005637	Qc	BL14816	g7615.t1	g2304.t1	g16503.t1	g9023.t1	g4157.t1	g8057.t1	g1777.t1	XP_033745608.1
OG0005638	K	BL13526	g14854.t1	g14194.t1	g26816.t1	g2727.t1	g21359.t1	g17858.t1	g13143.t1	XP_033739421.1
OG0005639	P	BL17371	g15309.t1	g28233.t1	g26620.t1	g23426.t2	g20301.t1	g17889.t1	g18685.t1	XP_033763572.1
OG0005640	A1a	BL01377	g10926.t1	g29282.t1	g3021.t1	g9807.t1	g16477.t1	g14570.t2	g4639.t1	XP_033734294.1
OG0005641	O2	BL05654	g17272.t1	g28597.t1	g17778.t2	g3311.t1	g22493.t1	g20444.t2	g8109.t1	XP_033741301.1
OG0005642	R	BL04757	g1647.t1	g3047.t1	g25267.t1	g3795.t1	g863.t1	g3341.t1	g12660.t1	XP_033751564.1
OG0005644	F	BL02974	g7382.t2	g27877.t1	g15697.t2	g13029.t1	g5735.t1	g8216.t1	g15090.t1	XP_033743335.1
OG0005645	Eb	BL28095	g5994.t1	g19099.t1	g12163.t2	g19360.t1	g9580.t1	g7828.t1	g11580.t1	XP_033745272.1
OG0005646	G	BL04050	g4867.t1	g19862.t1	g11357.t1	g3258.t1	g9755.t1	g7337.t1	g4239.t1	XP_033747554.1
OG0005647	H	BL19600	g3048.t1	g893.t1	g29244.t1	g9036.t1	g2945.t2	g745.t1	g162.t3	XP_033737069.1
OG0005648	J1	BL17856	g9868.t1	g1921.t1	g20153.t1	g21636.t2	g8150.t1	g4402.t1	g25349.t2	XP_033727365.1
OG0005649	L	BL06066	g9213.t1	g20976.t1	g19160.t1	g2868.t1	g8179.t1	g5152.t1	g6461.t1	XP_033738309.1
OG0005650	Qa	BL14872	g678.t1	g10294.t1	g24893.t1	g8252.t3	g3071.t1	g2643.t1	g1300.t3	XP_033734624.1
OG0005651	B3	BL02169	g5873.t2	g8047.t1	g11669.t1	g8335.t1	g9477.t2	g7057.t1	g21596.t2	XP_033728083.1
OG0005652	L	BL06222	g2694.t1	g2244.t1	g28231.t1	g2119.t1	g2138.t1	g1176.t1	g7761.t1	XP_033739130.1
OG0005653	A1a	BL01121	g11512.t2	g26262.t1	g4575.t1	g10495.t1	g16597.t1	g14098.t1	g4832.t1	XP_033734678.1
OG0005654	Ea	BL27673	g6407.t1	g12918.t1	g14682.t1	g19127.t1	g5880.t1	g10874.t2	g11548.t1	XP_033744929.1
OG0005655	Eb	BL27432	g9917.t1	g5664.t1	g21365.t1	g17924.t2	g6723.t1	g3495.t1	g11203.t1	XP_033745261.1
OG0005656	A1a	BL01371	g16005.t1	g20254.t1	g6417.t1	g8835.t3	g19185.t1	g11705.t1	g4693.t1	XP_033734869.1
OG0005657	J1	BL03750	g2932.t1	g10571.t1	g28954.t1	g21768.t1	g1200.t1	g600.t1	g25368.t1	XP_033727466.1
OG0005658	Ea	BL09264	g9045.t1	g12787.t1	g18998.t1	g19192.t1	g8881.t1	g5404.t1	g11206.t1	XP_033745885.1
OG0005659	A1a	BL14695	g11423.t1	g17788.t1	g2622.t1	g8042.t2	g15711.t1	g13864.t1	g4826.t1	XP_033734358.1
OG0005660	B3	BL02221	g3376.t1	g7252.t1	g29406.t1	g9587.t1	g2307.t1	g1067.t1	g22087.t1	XP_033728944.1
OG0005661	A1a	BL01714	g4233.t1	g8660.t1	g9645.t1	g8428.t1	g12409.t1	g5607.t1	g5967.t2	XP_033734828.1
OG0005662	A1a	BL14694	g12033.t1	g17702.t1	g3692.t1	g7983.t1	g15543.t1	g14859.t1	g4822.t1	XP_033733826.1
OG0005663	D	BL05401	g9974.t1	g7721.t1	g19195.t1	g14409.t1	g7949.t1	g5171.t1	g16546.t1	XP_033754006.1
OG0005664	O1	BL22132	g2261.t3	g1401.t1	g23877.t3	g162.t1	g434.t1	g1582.t1	g12906.t1	XP_033752791.1
OG0005665	H	BL24807	g2197.t1	g9895.t1	g23703.t1	g8716.t2	g2294.t3	g2096.t1	g1540.t1	XP_033743869.1
OG0005666	Eb	BL09289	g9020.t1	g8092.t1	g20344.t1	g17836.t1	g8156.t1	g3960.t1	g11618.t1	XP_033746392.1
OG0005667	A2	BL01945	g3510.t1	g2296.t1	g28847.t1	g19806.t1	g1064.t1	g405.t1	g24500.t1	XP_033757869.1
OG0005668	D	BL05365	g668.t1	g15084.t2	g24881.t1	g15137.t2	g885.t1	g2652.t1	g17127.t1	XP_033754910.1
OG0005669	B2	BL04154	g17703.t1	g15566.t1	g18733.t1	g19955.t1	g23171.t1	g21111.t1	g19215.t1	XP_033733366.1
OG0005670	M	BL18443	g19883.t1	g23458.t1	g13273.t1	g13383.t2	g16157.t1	g17638.t1	g23700.t1	XP_033732704.1
OG0005671	I	BL21428	g310.t1	g1567.t1	g25993.t1	g4419.t1	g2560.t1	g2934.t1	g11052.t1	XP_033757287.1
OG0005672	F	BL26499	g19058.t1	g16403.t1	g8026.t1	g12251.t1	g12937.t1	g16755.t1	g13817.t1	XP_033742673.1
OG0005673	G	BL24202	g2069.t1	g14894.t1	g29666.t1	g3705.t2	g1258.t1	g1465.t1	g2074.t1	XP_033748443.1
OG0005674	N	BL13900	g12234.t1	g16633.t1	g22959.t1	g6366.t1	g25233.t1	g19793.t1	g15742.t1	XP_033760175.1
OG0005675	H	BL12834	g2922.t1	g20467.t1	g28964.t1	g8883.t1	g72.t1	g612.t2	g1681.t1	XP_033753954.1
OG0005676	I	BL21918	g1302.t1	g2204.t1	g24562.t1	g333.t1	g2104.t1	g2280.t1	g9908.t1	XP_033756375.1
OG0005677	K	BL08361	g15004.t10	g12466.t1	g27933.t5	g3224.t3	g20771.t10	g17428.t1	g9224.t1	XP_033740794.1
OG0005678	C1	BL07476	g656.t1	g7184.t1	g24869.t1	g4404.t1	g642.t1	g2663.t1	g3423.t1	XP_033751084.1
OG0005679	B2	BL19813	g7314.t1	g15296.t1	g15609.t1	g20636.t1	g3856.t1	g8461.t1	g19112.t1	XP_033732052.1
OG0005680	C1	BL07091	g5368.t1	g14938.t1	g11910.t1	g3724.t1	g11196.t1	g7186.t1	g3556.t1	XP_033749408.1
OG0005682	M	BL18376	g19989.t1	g23706.t1	g13687.t1	g13486.t1	g18008.t1	g13343.t1	g24059.t1	XP_033732587.1
OG0005683	G	BL04007	g6534.t2	g12440.t1	g14498.t1	g580.t2	g4846.t3	g11055.t1	g2741.t3	XP_033748341.1
OG0005684	D	BL05197	g5600.t1	g8064.t1	g12574.t1	g15637.t1	g10591.t1	g7214.t1	g17627.t1	XP_033755661.1
OG0005685	K	BL00030	g13947.t1	g13251.t1	g28133.t1	g4046.t1	g20603.t1	g17087.t1	g8769.t1	XP_033739396.1
OG0005686	L	BL03684	g2283.t1	g21335.t1	g23673.t1	g2863.t1	g446.t1	g1487.t1	g6463.t1	XP_033738307.1
OG0005687	Eb	BL09422	g5578.t1	g15813.t1	g11766.t1	g18003.t1	g10317.t1	g7621.t1	g11998.t1	XP_033745386.1
OG0005688	G	BL19989	g7753.t1	g13452.t1	g16534.t1	g1075.t1	g3932.t1	g8431.t1	g4077.t1	XP_033748606.1
OG0005689	R	BL08385	g2395.t1	g11077.t1	g29920.t2	g2975.t2	g2423.t1	g1617.t2	g13158.t1	XP_033751626.1
OG0005690	D	BL05495	g8109.t1	g7574.t1	g14743.t1	g15350.t1	g4081.t1	g10895.t1	g17661.t1	XP_033755544.1
OG0005691	G	BL19986	g4103.t1	g18726.t3	g9723.t1	g1127.t1	g10189.t1	g5676.t1	g2081.t2	XP_033747571.1
OG0005692	G	BL10040	g3692.t1	g5272.t1	g9644.t1	g4731.t1	g12408.t1	g5606.t1	g3558.t1	XP_033748594.1
OG0005693	I	BL27090	g1069.t1	g10143.t1	g25103.t1	g12.t2	g1584.t2	g2483.t1	g9836.t1	XP_033757516.1
OG0005694	L	BL06105	g2292.t3	g21040.t1	g23678.t1	g3294.t1	g442.t1	g1491.t3	g6512.t1	XP_033738126.1
OG0005695	M	BL13418	g5668.t1	g3495.t1	g12392.t1	g12644.t1	g11040.t1	g7515.t1	g23889.t1	XP_033732731.1
OG0005696	G	BL20387	g3736.t2	g8246.t1	g9836.t1	g3696.t2	g10458.t3	g5756.t2	g3648.t1	XP_033748187.1
OG0005697	H	BL24681	g15318.t1	g21159.t1	g26627.t1	g8177.t1	g21545.t2	g17896.t1	g386.t1	XP_033751806.1
OG0005698	B2	BL11114	g1380.t1	g27048.t1	g24472.t1	g20874.t1	g1548.t1	g2149.t1	g19448.t1	XP_033726817.1
OG0005699	J2	BL07400	g7177.t1	g1581.t1	g15398.t1	g5891.t1	g5705.t1	g8092.t1	g6837.t1	XP_033738611.1
OG0005700	A1a	BL01739	g10750.t1	g25915.t1	g2974.t1	g11193.t1	g15986.t1	g14548.t1	g5770.t1	XP_033733700.1
OG0005701	H	BL02424	g5395.t1	g9784.t1	g11891.t1	g10465.t2	g11862.t1	g7177.t1	g1756.t1	XP_033739867.1
OG0005702	A2	BL01944	g960.t1	g9665.t1	g24182.t1	g20370.t1	g2410.t1	g1832.t1	g24785.t1	XP_033759048.1
OG0005703	C1	BL07508	g5642.t1	g15824.t1	g12365.t1	g4005.t1	g11695.t1	g7492.t1	g4221.t1	XP_033749827.1
OG0005704	P	BL14626	g14905.t1	g19702.t1	g26668.t2	g22769.t2	g21681.t1	g18033.t1	g18827.t1	XP_033724874.1
OG0005706	D	BL03600	g5864.t1	g5402.t1	g11694.t1	g14548.t1	g9707.t1	g6827.t2	g16756.t1	XP_033755427.1
OG0005707	H	BL24879	g1534.t1	g9859.t1	g24075.t1	g11144.t1	g3490.t1	g2119.t1	g288.t1	XP_033735017.1
OG0005708	C1	BL25227	g7516.t1	g14710.t1	g16394.t1	g3466.t1	g3769.t1	g9027.t1	g3812.t1	XP_033750154.1
OG0005709	Eb	BL16020	g3131.t1	g5414.t1	g29156.t1	g17837.t1	g1321.t1	g454.t1	g11500.t1	XP_033746394.1
OG0005710	Eb	BL21228	g4347.t1	g15051.t1	g10595.t1	g17661.t1	g12259.t1	g6340.t1	g11365.t2	XP_033745013.1
OG0005711	L	BL08655	g6963.t1	g20953.t1	g16343.t1	g1915.t1	g6021.t1	g8542.t1	g6796.t1	XP_033736917.1
OG0005712	B1	BL12739	g107.t1	g7289.t1	g26054.t1	g16585.t1	g2388.t1	g2977.t1	g22651.t1	XP_033762538.1
OG0005713	A1a	BL01620	g9144.t1	g4263.t1	g19021.t1	g8932.t1	g6677.t1	g5384.t1	g5011.t2	XP_033736188.1
OG0005714	I	BL17568	g7524.t1	g2841.t1	g16160.t1	g4174.t1	g4912.t1	g8325.t1	g9834.t1	XP_033757119.1
OG0005715	K	BL13556	g1495.t1	g4761.t1	g24013.t1	g5057.t1	g1488.t2	g1865.t1	g8133.t1	XP_033739821.1
OG0005716	O2	BL09834	g15288.t1	g13114.t2	g26989.t1	g1048.t1	g22053.t1	g17388.t1	g8256.t1	XP_033740719.1
OG0005717	Eb	BL11936	g4884.t1	g5654.t1	g11391.t1	g18808.t1	g10365.t1	g6874.t1	g11185.t1	XP_033745969.1
OG0005718	H	BL02410	g7199.t1	g3190.t1	g15467.t1	g8588.t1	g6198.t1	g8145.t1	g1215.t3	XP_033751150.1
OG0005719	K	BL06546	g14187.t3	g14260.t1	g28161.t1	g5845.t1	g20688.t1	g17122.t2	g7996.t1	XP_033740055.1
OG0005720	R	BL15565	g3343.t1	g22154.t1	g29456.t1	g5840.t1	g780.t1	g1034.t1	g13687.t1	XP_033753303.1
OG0005721	D	BL05026	g1619.t1	g7445.t1	g25225.t1	g14948.t1	g135.t1	g3379.t1	g16488.t2	XP_033753978.1
OG0005722	D	BL04951	g2265.t1	g12446.t4	g23882.t2	g14727.t2	g3534.t1	g1587.t1	g17722.t6	XP_033754859.1
OG0005723	F	BL03170	g19356.t2	g25149.t1	g7408.t1	g13007.t1	g12685.t2	g16592.t1	g13884.t1	XP_033743735.1
OG0005724	C1	BL07616	g6641.t1	g4211.t1	g16059.t1	g2742.t4	g5882.t1	g8603.t1	g2349.t1	XP_033751070.1
OG0005725	Ea	BL27444	g9556.t1	g8837.t1	g20295.t1	g17950.t1	g7052.t1	g4113.t1	g11243.t1	XP_033745078.1
OG0005726	M	BL18284	g19819.t1	g4129.t1	g12683.t1	g13409.t1	g17184.t1	g13653.t1	g24421.t1	XP_033727773.1
OG0005727	Ea	BL27876	g6082.t1	g6101.t1	g12065.t1	g18675.t1	g10848.t1	g7384.t1	g11261.t1	XP_033746580.1
OG0005728	B2	BL11285	g2713.t1	g5703.t1	g28255.t1	g20401.t1	g371.t1	g1194.t1	g19343.t4	XP_033733174.1
OG0005729	G	BL20208	g8118.t2	g5063.t1	g15220.t1	g5386.t1	g4945.t1	g10009.t1	g2440.t1	XP_033748783.1
OG0005730	L	BL08671	g4467.t2	g2313.t1	g10072.t1	g2794.t1	g11806.t1	g5941.t1	g6893.t1	XP_033736953.1
OG0005731	A1a	BL01001	g11818.t2	g25964.t1	g3973.t3	g7934.t1	g15053.t1	g14186.t1	g6069.t3	XP_033735222.1
OG0005732	D	BL19690	g1113.t1	g13488.t1	g25056.t1	g14636.t1	g3462.t1	g2524.t1	g17479.t1	XP_033754157.1
OG0005733	F	BL24592	g19021.t3	g25377.t1	g7956.t1	g13618.t1	g13495.t8	g16632.t1	g15198.t2	XP_033742919.1
OG0005734	C1	BL07833	g123.t1	g13411.t1	g26170.t1	g4590.t1	g377.t1	g2902.t1	g4184.t1	XP_033749673.1
OG0005735	F	BL24493	g18687.t1	g24639.t1	g7891.t1	g13322.t1	g13669.t1	g16602.t1	g13848.t1	XP_033743233.1
OG0005736	C1	BL07496	g9210.t1	g14996.t1	g19163.t1	g582.t1	g9322.t1	g5155.t1	g4080.t1	XP_033750507.1
OG0005737	L	BL06185	g8461.t1	g21164.t1	g15979.t1	g3504.t1	g4650.t1	g8687.t1	g7820.t1	XP_033738346.1
OG0005739	H	BL24878	g5393.t1	g9799.t1	g11893.t2	g10463.t1	g11864.t1	g7180.t1	g291.t1	XP_033735051.1
OG0005740	B3	BL04573	g2424.t1	g6448.t1	g23757.t1	g8229.t1	g2237.t1	g1819.t1	g21998.t1	XP_033728305.1
OG0005741	A1a	BL01050	g10651.t1	g26564.t1	g3123.t1	g9861.t1	g14715.t1	g14530.t1	g6110.t2	XP_033736169.1
OG0005742	M	BL18150	g16607.t1	g4025.t1	g5509.t1	g11851.t1	g18201.t2	g3861.t1	g24026.t1	XP_033730124.1
OG0005743	A1a	BL22390	g11574.t1	g19417.t1	g3484.t1	g9213.t1	g15577.t1	g13838.t1	g5570.t1	XP_033735556.1
OG0005744	D	BL05544	g2950.t1	g8728.t1	g29492.t2	g14065.t1	g1694.t1	g1339.t1	g16767.t1	XP_033754530.1
OG0005745	H	BL24787	g7400.t1	g2438.t2	g15720.t1	g9848.t2	g11230.t1	g8498.t1	g225.t2	XP_033747576.1
OG0005746	K	BL20945	g14814.t2	g14636.t1	g26882.t1	g374.t1	g22006.t1	g17597.t1	g8928.t1	XP_033741363.1
OG0005747	J1	BL20755	g6174.t1	g11179.t1	g11674.t1	g21409.t1	g10620.t1	g7061.t1	g25421.t1	XP_033726960.1
OG0005748	N	BL26226	g19164.t1	g24098.t1	g7601.t1	g7379.t1	g13916.t1	g16800.t1	g15548.t1	XP_033761246.1
OG0005749	K	BL00051	g14270.t2	g13131.t1	g27643.t3	g5542.t1	g21128.t1	g18393.t2	g9516.t1	XP_033741134.1
OG0005750	C1	BL03266	g1274.t1	g7555.t1	g24592.t1	g4588.t1	g2369.t1	g2307.t1	g2534.t1	XP_033750117.1
OG0005751	L	BL06307	g8182.t1	g1900.t1	g16457.t1	g2916.t1	g4231.t1	g8422.t1	g7419.t1	XP_033738667.1
OG0005752	B3	BL02319	g2423.t1	g6447.t1	g23754.t1	g8230.t1	g2238.t1	g1820.t1	g21999.t1	XP_033728307.1
OG0005753	C1	BL15918	g713.t1	g18796.t1	g25503.t1	g5255.t1	g3439.t1	g3155.t1	g3832.t1	XP_033750222.1
OG0005754	M	BL26994	g20078.t1	g4176.t1	g13986.t1	g12241.t3	g17365.t1	g12563.t1	g23973.t3	XP_033729704.1
OG0005755	C1	BL07339	g6118.t1	g6187.t1	g11755.t1	g3030.t4	g10332.t1	g7612.t2	g2100.t4	XP_033750964.1
OG0005756	A1a	BL13019	g15654.t1	g20375.t1	g6814.t1	g9265.t1	g18521.t1	g11280.t1	g6127.t1	XP_033733898.1
OG0005757	F	BL12982	g13274.t1	g24285.t1	g21834.t1	g12060.t1	g24899.t1	g19383.t2	g14860.t1	XP_033743678.1
OG0005758	F	BL02995	g14257.t1	g24621.t1	g27657.t1	g12733.t1	g21591.t1	g18401.t1	g13854.t2	XP_033743710.1
OG0005759	N	BL07996	g13634.t1	g17045.t1	g21973.t1	g6384.t1	g25152.t1	g18783.t1	g16299.t1	XP_033759887.1
OG0005761	J2	BL07670	g3564.t1	g21355.t1	g28532.t1	g2003.t1	g1681.t1	g918.t1	g7700.t1	XP_033737734.1
OG0005762	G	BL24248	g3733.t1	g12936.t1	g9834.t1	g1265.t1	g11780.t1	g5758.t1	g4015.t1	XP_033748734.1
OG0005763	I	BL17600	g2214.t1	g10198.t1	g23724.t1	g1066.t1	g2806.t1	g2085.t2	g10628.t4	XP_033756727.1
OG0005764	D	BL05536	g6089.t1	g7630.t1	g12058.t1	g14514.t1	g12008.t1	g7389.t1	g17705.t1	XP_033753912.1
OG0005765	F	BL03184	g18614.t1	g25496.t1	g7673.t1	g12348.t1	g13850.t1	g16454.t1	g14948.t2	XP_033742514.1

## Sheet: S2 Data
Species	Gene	Alias	Chromosome	Chromosome ID	Strand	Homeodomain exon 1 start	Homeodomain exon 1 end	Homeodomain exon 2 start	Homeodomain exon 2 end	Sequence
Bugulina stolonifera	Hox2	Pb	1	OW285187.1	minus	29386198	29386335	29384925	29384966	VPKRQRTAFTNTQLLELEKEFHYNKYLCRSRRIEIAKTLNLTERQVKIWFQNRRMKFKKV
Bugulina stolonifera	Hox4a	Dfda	1	OW285187.1	minus	29398344	29398523			DNKRTRTAYTRQQVLELEKEFHYNRYLTRRRRIEIAHTLTLSERQIKIWFQNRRMKWKKD
Bugulina stolonifera	Hox4b	Dfdb	3	OW285189.1	plus	10199810	10199989			DPKRARTAYTRHQILELEKEFHFNRYLTRRRRIEIAHTLDLTERQIKIWFQNRRMKWKKE
Bugulina stolonifera	Lox5	Ftz	1	OW285187.1	minus	29419020	29419199			EQKRTRQTYTRYQTLELEKEFHYNRYLTRRRRIEIAHTLGLTERQIKIWFQNRRMKWKKE
Bugulina stolonifera	Post2	AbdB	1	OW285187.1	minus	29443673	29443852			SSRKKRKPYTRYQTMVLETEFINNSYITRQKRWEISCRLRLTERQVKVWFQNRRMKRKKL
Membranipora membranacea	Hox2	Pb	1	OU612065.1	minus	21407698	21407835	21407432	21407473	LPKRQRTAFTNNQLLELEKEFHYNKYLCRSRRIEIAKALSLTERQVKIWFQNRRMKYKKV
Membranipora membranacea	Hox4a	Dfda	1	OU612065.1	minus	21424126	21424305			DPKRARTAYTRHQILELEKEFHFNRYLTRRRRVEISHTLCLSERQIKIWFQNRRMKWKKE
Membranipora membranacea	Hox4b	Dfdb	2	OU612066.1	plus	9374021	9374200			DNKRTRTAYTRQQVLELEKEFHYNRYLTRRRRIEIAHTLTLSERQIKIWFQNRRMKWKKD
Membranipora membranacea	Lox5	Ftz	1	OU612065.1	minus	21444875	21445054			EQKRTRQTYTRYQTLELEKEFHYNRYLTRRRRIEIAHTLGLTERQIKIWFQNRRMKWKKE
Membranipora membranacea	Lox4	Ubx	1	OU612065.1	minus	21462874	21463053			CKRRGRQTYTRHQTIELENEFQANAYLTRTRRIVISQTLSLSERQIKIWFQNRRMKQKRE
Membranipora membranacea	Post2	AbdB	1	OU612065.1	minus	21468243	21468422			SSRKKRKPYTRYQTMVLETEFINNSYITRQKRWEISCRLRLTERQVKVWFQNRRMKRKKL
Watersipora subatra	Hox2	Pb	1	OY755158.1	plus	7491123	7491260	7494372	7494413	LPKRQRTAFTNTQLLELEKEFHYNKYLCRSRRIEIAKALSLTERQVKIWFQNRRMKFKKV
Watersipora subatra	Hox4a	Dfda	1	OY755158.1	plus	7451121	7451300			DPKRARTAYTRHQILELEKEFHYNRYLTRRRRIEIAHTLDLSERQIKIWFQNRRMKWKKE
Watersipora subatra	Hox4b	Dfdb	4	OY755161.1	minus	9624658	9624837			DNKRTRTAYTRHQVLELEKEFHYNRYLTRRRRIEIAHTLSLSERQIKIWFQNRRMKWKKD
Watersipora subatra	Lox5	Ftz	1	OY755158.1	plus	7410643	7410822			EQKRTRQTYTRYQTLELEKEFHYNRYLTRRRRIEIAHTLGLTERQIKIWFQNRRMKWKKE
Watersipora subatra	Post2	AbdB	1	OY755158.1	plus	7370848	7371027			SARKKRKPYTRYQTMVLETEFINNSYITRQKRWEISCRLRLSERQVKVWFQNRRMKRKKL
Cristatella mucedo	Hox2	Pb	2	HiC_scaffold_2	plus	50625739	50625877	50630013	50630054	GSKRQRTAFTNIQLLELEKEFHFNKYLCRSRRMEIAKILSLTERQVKIWFQNRRMKFKKV
Cristatella mucedo	Hox4a	Dfda	2	HiC_scaffold_2	plus	50598995	50599174			EAKRVRTAYTRSQLLELEKEFHFNRYLTRRRRIEIARSLCLSERQIKIWFQNRRMKWKKE
Cristatella mucedo	Hox4b	Dfdb	1	HiC_scaffold_1	plus	99350261	99350440			ESKRTRTAYTRHQILELEKEFHFNRYLTRRRRIEIAHTLCLSERQIKIWFQNRRMKWKKE
Cristatella mucedo	Lox5a	Ftz	2	HiC_scaffold_2	plus	50489725	50489904			DQKRTRQTYTRFQTLELEKEFHYNRYLTRRRRIEIANALGLTERQIKIWFQNRRMKWKKE
Cristatella mucedo	Lox5b	Ftz	1	HiC_scaffold_1	plus	99054717	99054896			EQKRTRQTYTRYQTLELEKEFHYNRYLTRRRRIEIAHALGLTERQIKIWFQNRRMKWKKE
Cristatella mucedo	Lox4	Ubx	2	HiC_scaffold_2	plus	50452617	50452796			HRRRGRHTYSRQQTLELEKEFQYSSYLTRSRRIEMGRALELSERQIKIWFQNRRMKAKRE
Cristatella mucedo	Post2	AbdB	1	HiC_scaffold_1	plus	98946880	98947059			STRKKRKPYSRYQTMCLESEFLNNSYITRQKRWEVSCRLKLTERQVKVWFQNRRMKRKKL
Cryptosula pallasiana	Hox2	Pb	12	OX183141.1	plus	10989657	10989794	10992198	10992239	LPKRQRTAFTNTQLLELEKEFHYNKYLCRSRRIEIAKALSLTERQVKIWFQNRRMKYKKV
Cryptosula pallasiana	Hox4a	Dfda	12	OX183141.1	plus	10973423	10973602			DPKRARTAYTRHQILELEKEFHYNRYLTRRRRIEIAHTLDLSERQIKIWFQNRRMKWKKE
Cryptosula pallasiana	Hox4b	Dfdb	6	OX183135.1	minus	31981661	31981840			DNKRTRTAYTRQQVLELEKEFHYNRYLTRRRRIEIAHTLSLSERQIKIWFQNRRMKWKKD
Cryptosula pallasiana	Lox5	Ftz	12	OX183141.1	plus	10950597	10950776			EQKRTRQTYTRYQTLELEKEFHYNRYLTRRRRIEIAHTLGLTERQIKIWFQNRRMKWKKE
Cryptosula pallasiana	Post2	AbdB	12	OX183141.1	plus	10919418	10919597			SARKKRKPYTRYQTMVLETEFINNSYITRQKRWEISCRLRLTERQVKVWFQNRRMKRKKL
Pecten maximus	Hox1	Lab	2	NC_047016.1	minus	28829115	28829294			QPNMGRTNFTNKQLTELEKEFHFNKYLTRARRIEIAASLGLNETQVKIWFQNRRMKQKKR
Pecten maximus	Hox2	Pb	2	NC_047016.1	minus	28960993	28961172			GTRRLRTAYTNTQLLELEKEFHFNKYLCRPRRIEIAASLDLTERQVKVWFQNRRMKYKRQ
Pecten maximus	Hox3	zen	2	NC_047016.1	minus	29089117	29089296			PTKRARTAYTSAQLVELEKEFHFNRYLCRPRRIEMAALLNLTERQIKIWFQNRRMKFKKE
Pecten maximus	Hox4	Dfd	2	NC_047016.1	minus	29272838	29273017			ESKRNRTAYTRHQILELEKEFHFNRYLTRRRRIEIAHTLCLSERQIKIWFQNRRMKWKKE
Pecten maximus	Hox5	Scr	2	NC_047016.1	minus	29397397	29397576			ESKRSRTSYTRHQTLELEKEFHYNKYLTRRRRIEIAHALNLTERQIKIWFQNRRMKWKKD
Pecten maximus	Lox5	Ftz	2	NC_047016.1	minus	29542187	29542366			EQKRTRQTYTRYQTLELEKEFHYNRYLTRRRRIEIAHLLGLTERQIKIWFQNRRMKWKKE
Pecten maximus	Antp	Antp	2	NC_047016.1	minus	29656136	29656315			NRKRGRQTYTRYQTLELEKEFHFNKYLTRRRRVEIAHVLCLTERQIKIWFQNRRMKWKKE
Pecten maximus	Lox4	Ubx	2	NC_047016.1	minus	29780430	29780609			HRRRGRQTYSRYQTLELEKEFQFNHYLTRKRRIEVAHSLCLTERQIKIWFQNRRMKLKKE
Pecten maximus	Lox2	AbdA	2	NC_047016.1	minus	29934560	29934739			QRRRGRQTYTRFQTLELEKEFKFNRYLTRRRRIELSHMLCLTERQIKIWFQNRRMKEKKE
Pecten maximus	Post2	AbdB	2	NC_047016.1	minus	30127990	30128169			KGRKKRKPYTRYQSMVLENEFLNSSYITRQKRWEISCKLQLTERQVKVWFQNRRMKRKKL
Pecten maximus	Post1		2	NC_047016.1	minus	30620156	30620335			TLRKRRRPYSKFQIAELEREYNNSTYISKSRRWELSQLINLSERQIKIWFQNRRIKAKKV
Lineus longissimus	Hox1	Lab	13	OU343004.1	plus	4229127	4229306			QPNTGRTNFTNKQLTELEKEFHFNKYLTRARRIEIAAALGLNETQVKIWFQNRRMKQKKR
Lineus longissimus	Hox2	Pb	13	OU343004.1	plus	4186070	4186249			NPRRLRTAYTNSQLLELEKEFHFNKYLCRPRRIEIAASLDLTERQVKVWFQNRRMKFKRQ
Lineus longissimus	Hox3	zen	13	OU343004.1	plus	4135682	4135861			PPKRSRTAYTSAQLVELEKEFHFNRYLCRPRRIEMAALLNLSERQIKIWFQNRRMKYKKD
Lineus longissimus	Hox4	Dfd	13	OU343004.1	plus	4038214	4038393			ESKRTRTAYTRHQILELEKEFHFNRYLTRRRRIEIAHALCLTERQIKIWFQNRRMKWKKE
Lineus longissimus	Hox5	Scr	13	OU343004.1	plus	3994128	3994307			ENKRTRTSYTRYQTLELEKEFHFNRYLTRRRRIEIAHALNLTERQIKIWFQNRRMKWKKE
Lineus longissimus	Lox5	Ftz	13	OU343004.1	plus	3954384	3954563			EQKRTRQTYTRYQTLELEKEFHFNKYLTRRRRIEIAHALGLTERQIKIWFQNRRMKWKKE
Lineus longissimus	Antp	Antp	13	OU343004.1	plus	3927129	3927308			DRKRGRQTYTRYQTLELEKEFHFNKYLTRRRRIEIAHALCLTERQIKIWFQNRRMKWKKE
Lineus longissimus	Lox4	Ubx	13	OU343004.1	plus	3871300	3871479			QRRRGRQTYSRYQTLELEKEFQFNHYLTRRRRIEIAHSLCLTERQIKIWFQNRRMKLKKE
Lineus longissimus	Lox2	AbdA	13	OU343004.1	plus	3849837	3850016			QRRKGRQTYSRYQTLELEKEFKFNRYLTRRRRVELSALLCLSERQIKIWFQNRRMKEKKE
Lineus longissimus	Post2	AbdB	13	OU343004.1	plus	3807469	3807648			RTRKKRKPYTRYQTMVLENEFLTNSYITRQKRWEISCKLHLTERQVKVWFQNRRMKRKKL
